# Supplementary material for: EULAR recommendations for the use of imaging in the diagnosis and management of spondyloarthritis in clinical practice
Source: HighWire-hosted journal article supplement (doi:10.1136/annrheumdis-2014-206971), 2015-04-03

## **SUPPLEMENTARY MATERIAL**

### **S1. Research questions (RQ)**

#### **Making a diagnosis of spondyloarthritis**

**RQ1-** What is the diagnostic value of individual imaging modalities above clinical examination/criteria for axial SpA?

**RQ2-** What is the diagnostic value of individual imaging modalities above clinical examination/criteria for peripheral SpA (including peripheral psoriatic arthritis)?

#### **Monitoring disease activity and structural damage in spondyloarthritis**

**RQ3-** What is the ability, and added value above other measures (e.g. clinical examination, PROs, CRP, other imaging modalities) of individual imaging modalities to monitor disease activity in axial SpA?

**RQ4-** What is the ability, and added value above other measures (e.g. clinical examination, PROs, CRP, other imaging modalities) of individual imaging modalities to monitor structural changes in axial SpA?

**RQ5-** What is the ability, and added value above other measures (e.g. clinical examination, PROs, CRP, other imaging modalities) of individual imaging modalities to monitor disease activity in peripheral SpA(including peripheral psoriatic arthritis)?

**RQ6-** What is the ability, and added value above other measures (e.g. clinical examination, PROs, CRP, other imaging modalities) of individual imaging modalities to monitor structural changes in peripheral SpA(including peripheral psoriatic arthritis)?

#### **Predicting outcome (severity) and treatment response**

**RQ7-** What is the ability, and added value of individual imaging modalities above other measures (e.g. clinical examination, PROs, CRP, other imaging modalities) to predict outcome (severity) in axial SpA?

**RQ8-** What is the ability and value of individual imaging modalities above other measures (e.g. clinical examination, PROs, CRP, other imaging modalities) to predict treatment response in axial SpA?

**RQ9-** What is the ability, and added value of individual imaging modalities above other measures (e.g. clinical examination, PROs, CRP, other imaging modalities) to predict outcome (severity) in peripheral SpA?

**RQ10-** What is the diagnostic value of individual imaging modalities above other measures (e.g. clinical examination, PROs, CRP, other imaging modalities) to predict treatment response in peripheral SpA?

#### **Making a diagnosis of spinal fracture or osteoporosis in spondyloarthritis**

**RQ11-** What is the diagnostic value of individual imaging modalities above other imaging modalities for spinal fractures in SpA?

**RQ12-** What is the ability of individual imaging modalities to diagnose and monitor osteoporosis in SpA?

**S2. Details of search strategy performed using MEDLINE via Pubmed (1948 to January 2013) and EMBASE via Ovid (1980 to January 2013).**

**RQ1-10**

**Search strategy, MEDLINE via Pubmed**

1. "spondylarthropathies"[MeSH Terms]
2. spondylart\*[Text Word]
3. (Reactiv\*[TI] AND Arthriti\*[TI])
4. (Psoria\*[TI] AND Arthriti\*[TI])
5. (ankyl\*[TI] AND Spondyl\*[TI])
6. (((inflam\*[TiAB] AND (peripher\*[TIAB] OR tendon\*[TIAB] or tendinop\*[TIAB] OR limb\*[TIAB]) AND pain [TIAB] )))
7. spondylo\*[TiAB]
8. (((inflam\*[TiAB] AND (back[TIAB] OR spin\*[TIAB]) AND pain [TIAB])))
9. or/1-8
10. "Tomography"[Mesh]
11. "Magnetic Resonance Imaging"[Mesh]
12. "Ultrasonography"[Mesh]
13. "Tomography, X-Ray Computed"[Mesh]
14. "Positron-Emission Tomography and Computed Tomography"[Mesh]
15. "Positron-Emission Tomography"[Mesh]
16. "Tomography, Emission-Computed, Single-Photon"[Mesh]
17. ("magnetic"[All Fields] AND "resonance"[All Fields] AND "imaging"[All Fields])
18. "mri"[All Fields]
19. ultrasono\*[TIAB]
20. echograph\*[TIAB]
21. "CT scan\*"[TIAB]
22. tomograph\*[TIAB]
23. scintigraph\*[TIAB]
24. (PET[Title/Abstract]) AND tomog\*[Title/Abstract]
25. (SPECT[Title/Abstract]) AND photon[Title/Abstract]
26. or/10-25
27. 9 and 26
28. (animals[mh] NOT human[mh])
29. 27 not 28
30. (("case report\*" [TI]) OR (case reports[Publication Type]))
31. 29 not 30
32. english[Language]
33. 31 and 32

## Search strategy, EMBASE via Ovid

1. (magnetic and resonance and imaging).mp.
2. magnetic resonance imaging.mp.
3. mri.mp.
4. Ultrasonography.mp. or exp echography/
5. magnetic resonance imaging.mp. or exp nuclear magnetic resonance imaging/
6. "ultrasono\*".ti,ab.
7. Tomography, X-Ray Computed.mp. or exp computer assisted tomography/
8. "CT scan\*".ti,ab.
9. "echograph\*".ti,ab.
10. "tomograph\*".ti,ab.
11. "scintigraph\*".ti,ab.
12. Positron Emission Tomography.mp. or exp positron emission tomography/
13. (PET and tomog\*).ti,ab.
14. Tomography, Emission-Computed, Single-Photon.mp. or exp single photon emission computer tomography/
15. (SPECT and photon).ti,ab.
16. or/1-15
17. exp ankylosing spondylitis/
18. exp psoriatic arthritis/
19. exp reactive arthritis/
20. exp spondyloarthropathy/
21. (inflam\* and (peripher\* or tendon\* or tendinop\* or limb\*) and pain).ti,ab.
22. "spondylo\*".ti,ab.
23. (inflam\* and (back or spin\*) and pain).ti,ab.
24. or/17-23
25. 16 and 24
26. limit 25 to (conference abstract or conference paper or "conference review" or letter or conference proceeding)
27. 25 not 26
28. limit 27 to (animals or animal studies)
29. limit 28 to human
30. 28 not 29
31. 27 not 30
32. "case report\*".m\_titl.
33. case study.m\_titl.
34. case report/
35. or/28-30
36. 31 not 35
37. limit 36 to english language

## RQ11

### Search strategy, MEDLINE via Pubmed

1. "spondylarthropathies"[MeSH Terms]
2. spondylart\*[Text Word]
3. (Reactiv\*[TI] AND Arthriti\*[TI])
4. (Psoria\*[TI] AND Arthriti\*[TI])
5. (ankyl\*[TI] AND Spondyl\*[TI])
6. (((inflam\*[TiAB] AND (peripher\*[TIAB] OR tendon\*[TIAB] or tendinop\*[TIAB] OR limb\*[TIAB]) AND pain [TIAB] ))))
7. spondylo\*[TiAB]
8. (((inflam\*[TiAB] AND (back[TIAB] OR spin\*[TIAB]) AND pain [TIAB])))
9. or/1-8
10. "Tomography"[Mesh]
11. "Magnetic Resonance Imaging"[Mesh]
12. "Ultrasonography"[Mesh]
13. "Tomography, X-Ray Computed"[Mesh]
14. "Positron-Emission Tomography and Computed Tomography"[Mesh]
15. "Positron-Emission Tomography"[Mesh]
16. "Tomography, Emission-Computed, Single-Photon"[Mesh]
17. ("magnetic"[All Fields] AND "resonance"[All Fields] AND "imaging"[All Fields])
18. "mri"[All Fields]
19. ultrasono\*[TIAB]
20. echograph\*[TIAB]
21. "CT scan\*"[TIAB]
22. tomograph\*[TIAB]
23. scintigraph\*[TIAB]
24. (PET[Title/Abstract]) AND tomog\*[Title/Abstract]
25. (SPECT[Title/Abstract]) AND photon[Title/Abstract]
26. x\*ray\*
27. "Radiography"[Mesh]
28. or/10-27
29. "Fractures, Bone"[Mesh]
30. "Fractures, Spontaneous"[Mesh]
31. "Osteoporotic Fractures"[Mesh]
32. "Spinal Fractures"[Mesh])
33. fractur\*
34. or/29-33
35. 9 and 28 and 34
36. (animals[mh] NOT human[mh])
37. 35 not 36
38. (("case report\*" [TI]) OR (case reports[Publication Type]))
39. 37 not 38
40. english[Language]
41. 39 and 40

## Search strategy, EMBASE via Ovid

1. (magnetic and resonance and imaging).mp.
2. magnetic resonance imaging.mp.
3. mri.mp.
4. Ultrasonography.mp. or exp echography/
5. magnetic resonance imaging.mp. or exp nuclear magnetic resonance imaging/
6. "ultrasono\*".ti,ab.
7. Tomography, X-Ray Computed.mp. or exp computer assisted tomography/
8. "CT scan\*".ti,ab.
9. "echograph\*".ti,ab.
10. "tomograph\*".ti,ab.
11. "scintigraph\*".ti,ab.
12. Positron Emission Tomography.mp. or exp positron emission tomography/
13. (PET and tomog\*).ti,ab.
14. Tomography, Emission-Computed, Single-Photon.mp. or exp single photon emission computer tomography/
15. (SPECT and photon).ti,ab.
16. exp radiography/
17. x\*ray\*.mp.
18. exp X ray/
19. or/1-18
20. exp fracture/
21. fractur\*.mp.
22. or/20-21
23. exp ankylosing spondylitis/
24. exp psoriatic arthritis/
25. exp reactive arthritis/
26. exp spondyloarthropathy/
27. (inflam\* and (peripher\* or tendon\* or tendinop\* or limb\*) and pain).ti,ab.
28. "spondylo\*".ti,ab.
29. (inflam\* and (back or spin\*) and pain).ti,ab.
30. or/23-29
31. 19 and 22 and 30
32. limit 31 to (conference abstract or conference paper or "conference review" or letter or conference proceeding)
33. 31 not 32
34. limit 33 to (animals or animal studies)
35. limit 34 to human
36. 34 not 35
37. 33 not 36
38. "case report\*".m\_titl.
39. case study.m\_titl.
40. case report/
41. or/38-40
42. 37 not 41
43. limit 42 to english language

## RQ12

### Search strategy, MEDLINE via Pubmed

1. "spondylarthropathies"[MeSH Terms]
2. spondylart\*[Text Word]
3. (Reactiv\*[TI] AND Arthriti\*[TI])
4. (Psoria\*[TI] AND Arthriti\*[TI])
5. (ankyl\*[TI] AND Spondyl\*[TI])
6. (((inflam\*[TiAB] AND (peripher\*[TIAB] OR tendon\*[TIAB] or tendinop\*[TIAB] OR limb\*[TIAB]) AND pain [TIAB] ))))
7. spondylo\*[TiAB]
8. (((inflam\*[TiAB] AND (back[TIAB] OR spin\*[TIAB]) AND pain [TIAB])))
9. or/1-8
10. "Tomography"[Mesh]
11. "Magnetic Resonance Imaging"[Mesh]
12. "Ultrasonography"[Mesh]
13. "Tomography, X-Ray Computed"[Mesh]
14. "Positron-Emission Tomography and Computed Tomography"[Mesh]
15. "Positron-Emission Tomography"[Mesh]
16. "Tomography, Emission-Computed, Single-Photon"[Mesh]
17. ("magnetic"[All Fields] AND "resonance"[All Fields] AND "imaging"[All Fields])
18. "mri"[All Fields]
19. ultrasono\*[TIAB]
20. echograph\*[TIAB]
21. "CT scan\*"[TIAB]
22. tomograph\*[TIAB]
23. scintigraph\*[TIAB]
24. (PET[Title/Abstract] AND tomog\*[Title/Abstract])
25. (SPECT[Title/Abstract] AND photon[Title/Abstract])
26. x\*ray\*
27. "Radiography"[Mesh]
28. "Absorptiometry, Photon"[Mesh]
29. DEXA
30. (bone\*[TIAB]) AND densit\*[TIAB]
31. "Bone Density"[Mesh]
32. or/10-31
33. osteoporo\*
34. "Osteoporosis"[Mesh]
35. "Bone Density"[Mesh]
36. ((bone\*[TIAB]) AND (loss\*[TIAB] OR densit\*[TIAB] OR mass\*[TIAB]))
37. or/33-36
38. 9 and 32 and 37
39. (animals[mh] NOT human[mh])
40. 38 not 39
41. (("case report\*" [TI]) OR (case reports[Publication Type]))
42. 40 not 41
43. english[Language]
44. 42 and 43

## Search strategy, EMBASE via Ovid

1. (magnetic and resonance and imaging).mp.
2. magnetic resonance imaging.mp.
3. mri.mp.
4. Ultrasonography.mp. or exp echography/
5. magnetic resonance imaging.mp. or exp nuclear magnetic resonance imaging/
6. "ultrasono\*".ti,ab.
7. Tomography, X-Ray Computed.mp. or exp computer assisted tomography/
8. "CT scan\*".ti,ab.
9. "echograph\*".ti,ab.
10. "tomograph\*".ti,ab.
11. "scintigraph\*".ti,ab.
12. Positron Emission Tomography.mp. or exp positron emission tomography/
13. (PET and tomog\*).ti,ab.
14. Tomography, Emission-Computed, Single-Photon.mp. or exp single photon emission computer tomography/
15. (SPECT and photon).ti,ab.
16. exp radiography/
17. x\*ray\*.mp.
18. exp X ray/
19. DEXA.mp. or exp dual energy X ray absorptiometry/
20. exp absorptiometry/ or exp photon absorptiometry/
21. (bone\* and (loss\* or densit\* or mass\*)).ti,ab.
22. Bone Density.mp. or exp bone density/
23. or/1-22
24. (bone\* and (loss\* or densit\* or mass\*)).ti,ab.
25. Bone Density.mp. or exp bone density/
26. exp osteoporosis/ or Osteoporosis.mp.
27. osteoporo\*.mp
28. or/24-27
29. exp ankylosing spondylitis/
30. exp psoriatic arthritis/
31. exp reactive arthritis/
32. exp spondyloarthropathy/
33. (inflam\* and (peripher\* or tendon\* or tendinop\* or limb\*) and pain).ti,ab.
34. "spondylo\*".ti,ab.
35. (inflam\* and (back or spin\*) and pain).ti,ab.
36. or/29-35
37. 23 and 28 and 36
38. limit 37 to (conference abstract or conference paper or "conference review" or letter or conference proceeding)
39. 37 not 38
40. limit 39 to (animals or animal studies)
41. limit 40 to human
42. 40 not 41
43. 39 not 42
44. "case report\*".m\_titl.
45. case study.m\_titl.
46. case report/

- 47. or/44-46
- 48. 43 not 47
- 49. limit 48 to english language



**S3. Flowcharts showing the three separate literature searches of 7550 articles, from which 298 articles were selected for detailed review; 157 articles were included in the final analysis.**

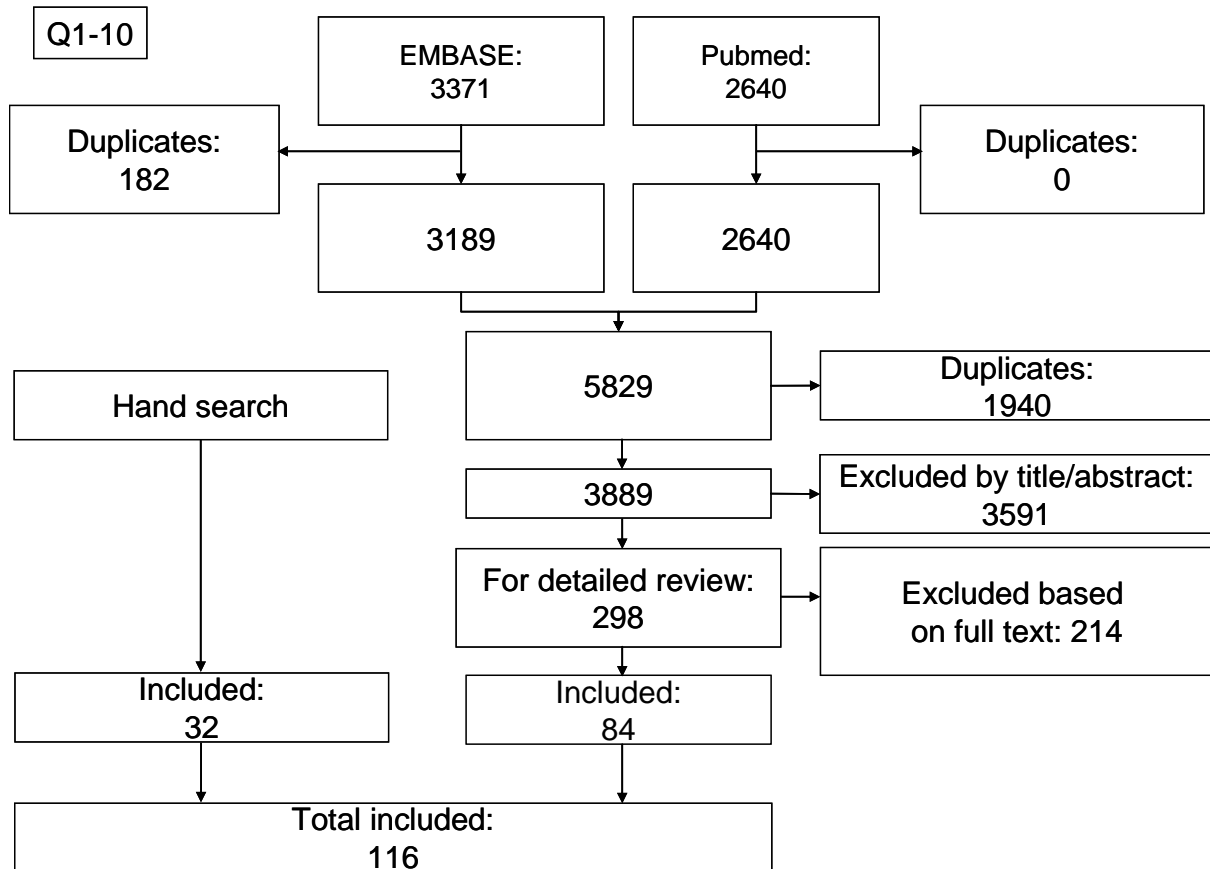

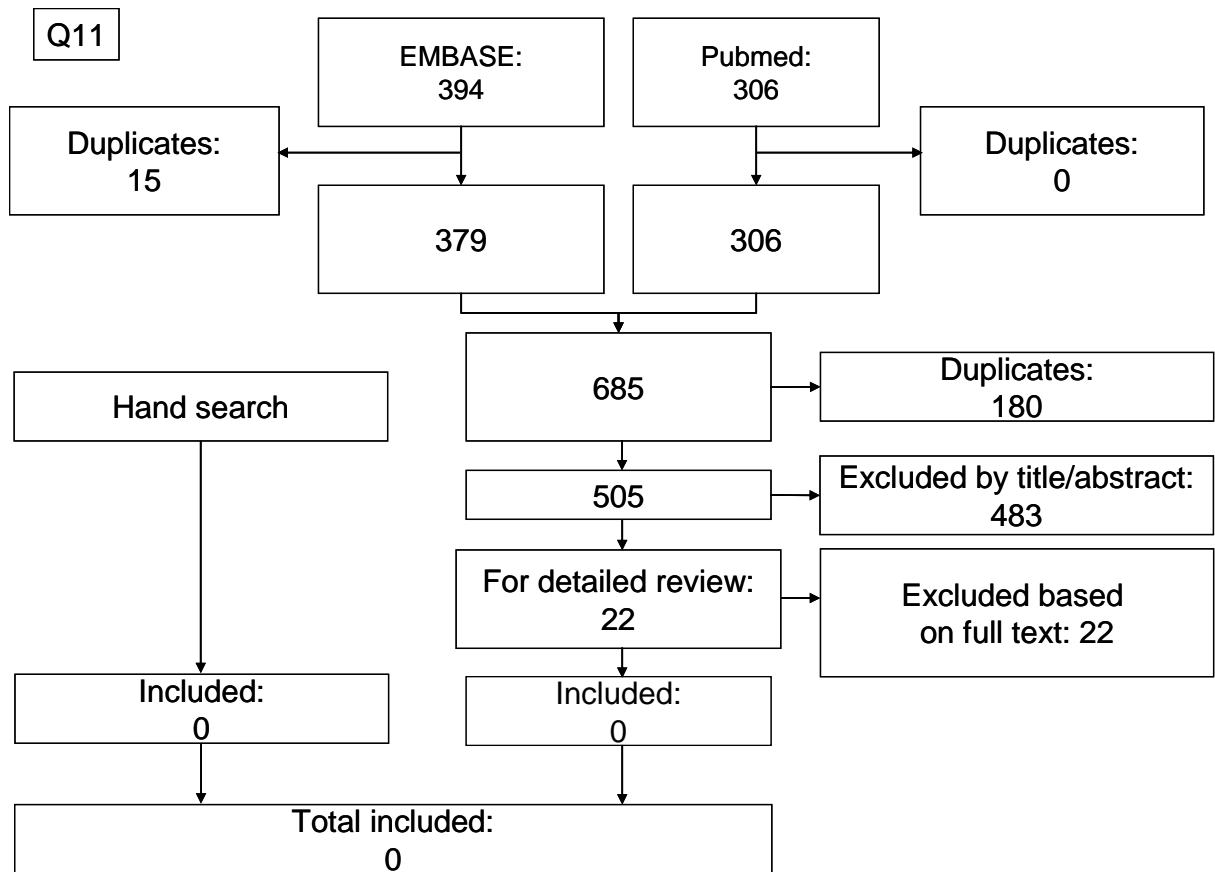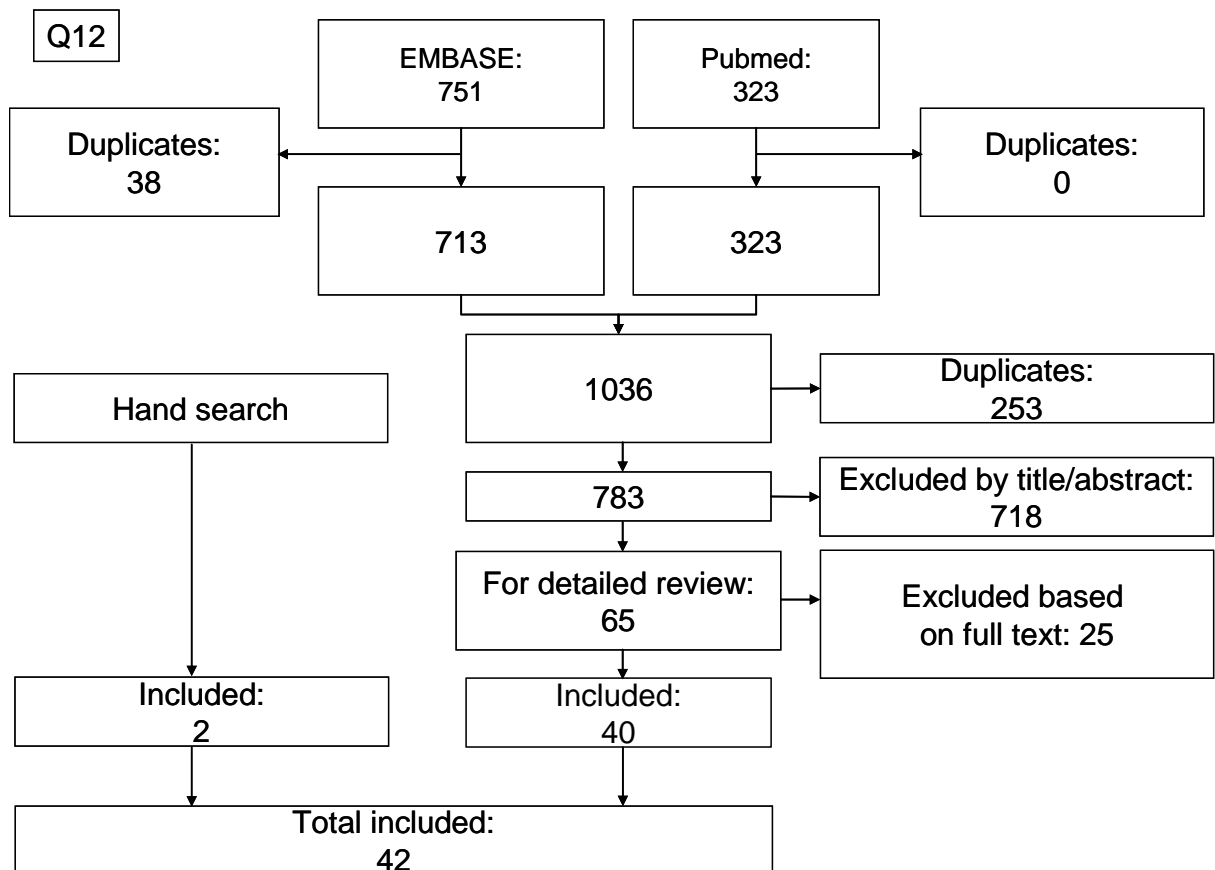

#### S4. Number of included articles per research question

|                                                                                                                                                                                                                                                                    | Number of included articles |
|--------------------------------------------------------------------------------------------------------------------------------------------------------------------------------------------------------------------------------------------------------------------|-----------------------------|
| <b>RQ1- What is the diagnostic value of individual imaging modalities above clinical examination/criteria for axial SpA?</b>                                                                                                                                       | <b>25</b>                   |
| <b>RQ2- What is the diagnostic value of individual imaging modalities above clinical examination/criteria for peripheral SpA (including peripheral psoriatic arthritis)?</b>                                                                                       | <b>9</b>                    |
| <b>RQ3- What is the ability, and added value above other measures (e.g. clinical examination, PROs, CRP, other imaging modalities) of individual imaging modalities to monitor disease activity in axial SpA?</b>                                                  | <b>34</b>                   |
| <b>RQ4- What is the ability, and added value above other measures (e.g. clinical examination, PROs, CRP, other imaging modalities) of individual imaging modalities to monitor structural changes in axial SpA?</b>                                                | <b>23</b>                   |
| <b>RQ5- What is the ability, and added value above other measures (e.g. clinical examination, PROs, CRP, other imaging modalities) of individual imaging modalities to monitor disease activity in peripheral SpA(including peripheral psoriatic arthritis)?</b>   | <b>15</b>                   |
| <b>RQ6- What is the ability, and added value above other measures (e.g. clinical examination, PROs, CRP, other imaging modalities) of individual imaging modalities to monitor structural changes in peripheral SpA(including peripheral psoriatic arthritis)?</b> | <b>8</b>                    |
| <b>RQ7- What is the ability, and added value of individual imaging modalities above other measures (e.g. clinical examination, PROs, CRP, other imaging modalities) to predict outcome (severity) in axial SpA?</b>                                                | <b>17</b>                   |
| <b>RQ8- What is the ability and value of individual imaging modalities above other measures (e.g. clinical examination, PROs, CRP, other imaging modalities) to predict treatment response in axial SpA?</b>                                                       | <b>3</b>                    |
| <b>RQ9 - What is the ability, and added value of individual imaging modalities above other measures (e.g. clinical examination, PROs, CRP, other imaging modalities) to predict outcome (severity) in peripheral SpA?</b>                                          | <b>3</b>                    |
| <b>RQ10- What is the diagnostic value of individual imaging modalities above other measures (e.g. clinical examination, PROs, CRP, other imaging modalities) to predict treatment response in peripheral SpA?</b>                                                  | <b>0</b>                    |
| <b>RQ11 - What is the diagnostic value of individual imaging modalities above other imaging modalities for spinal fractures in SpA?</b>                                                                                                                            | <b>0</b>                    |
| <b>RQ12 - What is the ability of individual imaging modalities to diagnose and monitor osteoporosis in SpA?</b>                                                                                                                                                    | <b>42</b>                   |

## **S5. Reference list of included articles per recommendation**

### **Recommendation 1: Diagnosing axial SpA**

**A. In general, conventional radiography of the SI joints is recommended as the first imaging method to diagnose sacroiliitis as part of axial SpA. In certain cases, such as young patients and those with short symptom duration, MRI of the SI joints is an alternative first imaging method.**

**B. If the diagnosis of axial SpA cannot be established based on clinical features and conventional radiography, and axial SpA is still suspected, MRI of the SI joints is recommended. On MRI, both active inflammatory lesions (primarily bone marrow edema) and structural lesions (such as bone erosion, new bone formation, sclerosis and fat infiltration) should be considered. MRI of the spine is not generally recommended to diagnose axial SpA.**

**C. Imaging modalities other than conventional radiography and MRI are not generally recommended in the diagnosis of axial SpA\*.**

**\*CT may provide additional information on structural damage if conventional radiography is negative and MRI cannot be performed. Scintigraphy and US are not recommended for diagnosis of sacroiliitis as part of axial SpA.**

1. Bennett AN, McGonagle D, O'Connor P, et al. Severity of baseline magnetic resonance imaging-evident sacroiliitis and HLA-B27 status in early inflammatory back pain predict radiographically evident ankylosing spondylitis at eight years. *Arthritis Rheum* 2008;58:3413-8.
2. Bennett AN, Rehman A, Hensor EM, et al. Evaluation of the diagnostic utility of spinal magnetic resonance imaging in axial spondylarthritis. *Arthritis Rheum* 2009;60:1331-41.
3. Bennett AN, Rehman A, Hensor EM, et al. The fatty Romanus lesion: a non-inflammatory spinal MRI lesion specific for axial spondyloarthritis. *Ann Rheum Dis* 2010;69:891-4.
4. Blum U, Buitrago-Tellez C, Mundinger A, et al. Magnetic resonance imaging (MRI) for detection of active sacroiliitis--a prospective study comparing conventional radiography, scintigraphy, and contrast enhanced MRI. *J Rheumatol* 1996;23:2107-15.
5. Chase WF, Houk RW, Winn RE, et al. The clinical usefulness of radionuclide scintigraphy in suspected sacro-iliitis: a prospective study. *Br J Rheumatol* 1983;22:67-72.
6. Devauchelle-Pensec V, D'Agostino MA, Marion J, et al. Computed tomography scanning facilitates the diagnosis of sacroiliitis in patients with suspected spondylarthritis: results of a prospective multicenter French cohort study. *Arthritis Rheum* 2012;64:1412-9.
7. Geijer M, Göthlin GG, Göthlin JH. The clinical utility of computed tomography compared to conventional radiography in diagnosing sacroiliitis. A retrospective study on 910 patients and literature review. *J Rheumatol* 2007;34:1561-5.
8. Goie The HS, Steven MM, van der Linden SM, et al. Evaluation of diagnostic criteria for ankylosing spondylitis: a comparison of the Rome, New York and modified New York criteria in patients with a positive clinical history screening test for ankylosing spondylitis. *Br J Rheumatol* 1985;24:242-9.

9. Heuft-Dorenbosch L, Landewé R, Weijers R, et al. Combining information obtained from magnetic resonance imaging and conventional radiographs to detect sacroiliitis in patients with recent onset inflammatory back pain. *Ann Rheum Dis* 2006;65:804-8.
10. Inanc N, Atagündüz P, Sen F, et al. The investigation of sacroiliitis with different imaging techniques in spondyloarthropathies. *Rheumatol Int* 2005;25:591-4.
11. Kim NR, Choi JY, Hong SH, et al. "MR corner sign": value for predicting presence of ankylosing spondylitis. *AJR Am J Roentgenol* 2008;191:124-8.
12. Klauser A, Halpern EJ, Frauscher F, et al. Inflammatory low back pain: high negative predictive value of contrast-enhanced color Doppler ultrasound in the detection of inflamed sacroiliac joints. *Arthritis Rheum* 2005;53:440-4.
13. Klauser AS, De Zordo T, Bellmann-Weiler R, et al. Feasibility of second-generation ultrasound contrast media in the detection of active sacroiliitis. *Arthritis Rheum* 2009;61:909-16.
14. Marzo-Ortega H, McGonagle D, O'Connor P, et al. Baseline and 1-year magnetic resonance imaging of the sacroiliac joint and lumbar spine in very early inflammatory back pain. Relationship between symptoms, HLA-B27 and disease extent and persistence. *Ann Rheum Dis* 2009;68:1721-7.
15. Mohammadi A, Ghasemi-rad M, Aghdashi M, et al. Evaluation of disease activity in ankylosing spondylitis; diagnostic value of color Doppler ultrasonography. *Skeletal Radiol* 2013;42:219-24.
16. Oostveen J, Prevo R, den Boer J, et al. Early detection of sacroiliitis on magnetic resonance imaging and subsequent development of sacroiliitis on plain radiography. A prospective, longitudinal study. *J Rheumatol* 1999;26:1953-8.
17. Song IH, Brandt H, Rudwaleit M, et al. Limited diagnostic value of unilateral sacroiliitis in scintigraphy in assessing axial spondyloarthritis. *J Rheumatol* 2010;37:1200-2.
18. van Tubergen A, Heuft-Dorenbosch L, Schulpen G, et al. Radiographic assessment of sacroiliitis by radiologists and rheumatologists: does training improve quality? *Ann Rheum Dis* 2003;62:519-25.
19. Weber U, Hodler J, Kubik RA, et al. Sensitivity and specificity of spinal inflammatory lesions assessed by whole-body magnetic resonance imaging in patients with ankylosing spondylitis or recent-onset inflammatory back pain. *Arthritis Rheum* 2009;61:900-8.
20. Weber U, Lambert RG, Østergaard M, et al. The diagnostic utility of magnetic resonance imaging in spondylarthritis: an international multicenter evaluation of one hundred eighty-seven subjects. *Arthritis Rheum* 2010;62:3048-58.
21. Weber U, Lambert RG, Pedersen SJ, et al. Assessment of structural lesions in sacroiliac joints enhances diagnostic utility of magnetic resonance imaging in early spondylarthritis. *Arthritis Care Res (Hoboken)* 2010;62:1763-71.

22. Weber U, Pedersen SJ, Zubler V, et al. What constitutes the characteristic fat lesion on MRI of the sacroiliac joints in early spondyloarthritis? *Arthritis Rheum* 2012;64 Suppl 10:1024
23. Weber U, Zubler V, Pedersen SJ, et al. Development and validation of a magnetic resonance imaging reference criterion for defining a positive sacroiliac joint magnetic resonance imaging finding in spondyloarthritis. *Arthritis Care Res Hoboken* 2013;65:977-85.
24. Weber U, Zubler V, Zhao Z, et al. Does spinal MRI add incremental diagnostic value to MRI of the sacroiliac joints alone in patients with non-radiographic axial spondyloarthritis? *Ann Rheum Dis* 2014 Jan 22. [Epub ahead of print]
25. Wick MC, Weiss RJ, Jaschke W, et al. Erosions are the most relevant magnetic resonance imaging features in quantification of sacroiliac joints in ankylosing spondylitis. *J Rheumatol* 2010;37:622-7.

### **Recommendation 2: Diagnosing peripheral SpA**

**When peripheral SpA is suspected, US or MRI may be used to detect peripheral enthesitis, which may support the diagnosis of SpA. Furthermore, US or MRI might be used to detect peripheral arthritis, tenosynovitis and bursitis.**

1. Aydin SZ, Ash ZR, Tinazzi I, et al. The link between enthesitis and arthritis in psoriatic arthritis: a switch to a vascular phenotype at insertions may play a role in arthritis development. *Ann Rheum Dis* 2013;72:992-5.
2. D'Agostino MA, Said-Nahal R, Hacquard-Bouder C, et al. Assessment of peripheral enthesitis in the spondylarthropathies by ultrasonography combined with power Doppler: a cross-sectional study. *Arthritis Rheum* 2003;48:523-33.
3. D'Agostino MA, Aegerter P, Bechara K, et al. How to diagnose spondyloarthritis early? Accuracy of peripheral enthesitis detection by power Doppler ultrasonography. *Ann Rheum Dis* 2011;70:1433-40.
4. de Miguel E, Cobo T, Muñoz-Fernández S, et al. Validity of enthesitis ultrasound assessment in spondyloarthropathy. *Ann Rheum Dis* 2009;68:169-74.
5. de Miguel E, Muñoz-Fernández S, Castillo C, et al. Diagnostic accuracy of enthesitis ultrasound in the diagnosis of early spondyloarthritis. *Ann Rheum Dis* 2011;70:434-9.
6. Farouk HM, Mostafa AA, Youssef SS, et al. Value of enthesal ultrasonography and serum cartilage oligomeric matrix protein in the preclinical diagnosis of psoriatic arthritis. *Clin Med Insights Arthritis Musculoskelet Disord* 2010 29;3:7-14.
7. Feydy A, Lavie-Brion MC, Gossec L, et al. Comparative study of MRI and power Doppler ultrasonography of the heel in patients with spondyloarthritis with and without heel pain and in controls. *Ann Rheum Dis* 2012;71:498-503.
8. Ibrahim G, Groves C, Chandramohan M, et al. Clinical and ultrasound examination of the Leeds enthesitis index in psoriatic arthritis and rheumatoid arthritis. *ISRN Rheumatol* 2011;:731917.

9. Marchesoni A, De Lucia O, Rotunno L, et al. Enthesal power Doppler ultrasonography: a comparison of psoriatic arthritis and fibromyalgia. *J Rheumatol* 2012;89:29-31.

### **Recommendation 3: Monitoring disease activity in axial SpA**

**MRI of the SI-joints and/or the spine may be used to assess and monitor disease activity in axial SpA, providing additional information on top of clinical and biochemical assessments. The decision on when to repeat MRI depends on the clinical circumstances. In general, STIR sequences are sufficient to detect inflammation and the use of contrast medium is not needed.**

1. Althoff CE, Feist E, Burova E, et al. Magnetic resonance imaging of active sacroiliitis: do we really need gadolinium? *Eur J Radiol* 2009;71:232-6.
2. Baraliakos X, Hermann KG, Landewé R, et al. Assessment of acute spinal inflammation in patients with ankylosing spondylitis by magnetic resonance imaging: a comparison between contrast enhanced T1 and short tau inversion recovery (STIR) sequences. *Ann Rheum Dis* 2005;64:1141-4.
3. Baraliakos X, Davis J, Tsuji W, et al. Magnetic resonance imaging examinations of the spine in patients with ankylosing spondylitis before and after therapy with the tumor necrosis factor alpha receptor fusion protein etanercept. *Arthritis Rheum* 2005;52:1216-23.
4. Blachier M, Coutanceau B, Dougados M, et al. Does the site of magnetic resonance imaging abnormalities match the site of recent-onset inflammatory back pain? The DESIR cohort. *Ann Rheum Dis* 2013;72:979-85.
5. Bonel HM, Boller C, Saar B, et al. Short-term changes in magnetic resonance imaging and disease activity in response to infliximab. *Ann Rheum Dis* 2010;69:120-5.
6. Braun J, Baraliakos X, Golder W, et al. Magnetic resonance imaging examinations of the spine in patients with ankylosing spondylitis, before and after successful therapy with infliximab: evaluation of a new scoring system. *Arthritis Rheum* 2003;48:1126-36.
7. Braun J, Baraliakos X, Hermann KG, et al. Golimumab reduces spinal inflammation in ankylosing spondylitis: MRI results of the randomised, placebo- controlled GO-RAISE study. *Ann Rheum Dis* 2012;71:878-84.
8. de Hooze M, van den Berg R, Navarro-Compán V, et al. Magnetic resonance imaging of the sacroiliac joints in the early detection of spondyloarthritis: no added value of gadolinium compared with short tau inversion recovery sequence. *Rheumatology (Oxford)* 2013;52:1220-4.
9. Goh L, Suresh P, Gafoor A, et al. Disease activity in longstanding ankylosing spondylitis: a correlation of clinical and magnetic resonance imaging findings. *Clin Rheumatol* 2008;27:449-55.

10. Hermann KG, Landewé RB, Braun J, et al. Magnetic resonance imaging of inflammatory lesions in the spine in ankylosing spondylitis clinical trials: is paramagnetic contrast medium necessary? *J Rheumatol* 2005;32:2056-60.
11. Hu Z, Xu M, Li Q, et al. Adalimumab significantly reduces inflammation and serum DKK-1 level but increases fatty deposition in lumbar spine in active ankylosing spondylitis. *Int J Rheum Dis* 2012;15:358-65.
12. Kiltz U, Baraliakos X, Karakostas P, et al. The degree of spinal inflammation is similar in patients with axial spondyloarthritis who report high or low levels of disease activity: a cohort study. *Ann Rheum Dis* 2012;71:1207-11.
13. Konca S, Keskin D, Ciliz D, et al. Spinal inflammation by magnetic resonance imaging in patients with ankylosing spondylitis: association with disease activity and outcome parameters. *Rheumatol Int* 2012;32:3765-70.
14. Lambert RG, Salonen D, Rahman P, et al. Adalimumab significantly reduces both spinal and sacroiliac joint inflammation in patients with ankylosing spondylitis: a multicenter, randomized, double-blind, placebo-controlled study. *Arthritis Rheum* 2007;56:4005-14.
15. Lukas C, Braun J, van der Heijde D, et al. Scoring inflammatory activity of the spine by magnetic resonance imaging in ankylosing spondylitis: a multireader experiment. *J Rheumatol* 2007;34:862-70.
16. Machado P, Landewé R, Braun J et al. A stratified model for health outcomes in ankylosing spondylitis. *Ann Rheum Dis* 2011;70:1758-64.
17. Machado P, Landewé RB, Braun J, et al. MRI inflammation and its relation with measures of clinical disease activity and different treatment responses in patients with ankylosing spondylitis treated with a tumour necrosis factor inhibitor. *Ann Rheum Dis* 2012;71:2002-5.
18. Madsen KB, Egund N, Jurik AG. Grading of inflammatory disease activity in the sacroiliac joints with magnetic resonance imaging: comparison between short-tau inversion recovery and gadolinium contrast-enhanced sequences. *J Rheumatol* 2010;37:393-400.
19. Maksymowych WP, Dhillon SS, Park R, Salonen D, Inman RD, Lambert RG. Validation of the spondyloarthritis research consortium of Canada magnetic resonance imaging spinal inflammation index: is it necessary to score the entire spine? *Arthritis Rheum* 2007;57:501-7.
20. Maksymowych WP, Salonen D, Inman RD, et al. Low-dose infliximab (3 mg/kg) significantly reduces spinal inflammation on magnetic resonance imaging in patients with ankylosing spondylitis: a randomized placebo-controlled study. *J Rheumatol* 2010;37:1728-34.
21. Marzo-Ortega H, McGonagle D, Jarrett S, et al. Infliximab in combination with methotrexate in active ankylosing spondylitis: a clinical and imaging study. *Ann Rheum Dis* 2005;64:1568-75.



22. Marzo-Ortega H, McGonagle D, O'Connor P, et al. Baseline and 1-year magnetic resonance imaging of the sacroiliac joint and lumbar spine in very early inflammatory back pain. Relationship between symptoms, HLA-B27 and disease extent and persistence. *Ann Rheum Dis* 2009;68:1721-7.
23. Oostveen J, Prevo R, den Boer J, et al. Early detection of sacroiliitis on magnetic resonance imaging and subsequent development of sacroiliitis on plain radiography. A prospective, longitudinal study. *J Rheumatol* 1999;26:1953-8.
24. Pedersen SJ, Sørensen IJ, Hermann KG, et al. Responsiveness of the Ankylosing Spondylitis Disease Activity Score (ASDAS) and clinical and MRI measures of disease activity in a 1-year follow-up study of patients with axial spondyloarthritis treated with tumour necrosis factor alpha inhibitors. *Ann Rheum Dis* 2010;69:1065-71.
25. Puhakka KB, Jurik AG, Schiøttz-Christensen B, et al. Magnetic resonance imaging of sacroiliitis in early seronegative spondylarthropathy. Abnormalities correlated to clinical and laboratory findings. *Rheumatology (Oxford)* 2004;43:234-7.
26. Puhakka KB, Jurik AG, Schiøttz-Christensen B, et al. MRI abnormalities of sacroiliac joints in early spondylarthropathy: a 1-year follow-up study. *Scand J Rheumatol* 2004;33:332-8.
27. Rudwaleit M, Baraliakos X, Listing J, Brandt J, Sieper J, Braun J. Magnetic resonance imaging of the spine and the sacroiliac joints in ankylosing spondylitis and undifferentiated spondyloarthritis during treatment with etanercept. *Ann Rheum Dis* 2005;64:1305-10.
28. Rudwaleit M, Schwarzlose S, Hilgert ES, et al. MRI in predicting a major clinical response to anti-tumour necrosis factor treatment in ankylosing spondylitis. *Ann Rheum Dis* 2008;67:1276-81.
29. Sieper J, Baraliakos X, Listing J, et al. Persistent reduction of spinal inflammation as assessed by magnetic resonance imaging in patients with ankylosing spondylitis after 2 yrs of treatment with the anti-tumour necrosis factor agent infliximab. *Rheumatology (Oxford)* 2005;44:1525-30.
30. Sieper J, van der Heijde D, Dougados M, et al. Efficacy and safety of adalimumab in patients with non-radiographic axial spondyloarthritis: results of a randomised placebo-controlled trial (ABILITY-1). *Ann Rheum Dis* 2013;72:815-22.
31. Song IH, Hermann K, Haibel H, et al. Effects of etanercept versus sulfasalazine in early axial spondyloarthritis on active inflammatory lesions as detected by whole-body MRI (ESTHER): a 48-week randomised controlled trial. *Ann Rheum Dis* 2011;70:590-6.
32. Visvanathan S, Wagner C, Marini JC, et al. Inflammatory biomarkers, disease activity and spinal disease measures in patients with ankylosing spondylitis after treatment with infliximab. *Ann Rheum Dis* 2008;67:511-7.

33. Weber U, Maksymowych WP, Jurik AG. Validation of whole-body against conventional magnetic resonance imaging for scoring acute inflammatory lesions in the sacroiliac joints of patients with spondylarthritis. *Arthritis Rheum* 2009;61:893-9.
34. Weber U, Lambert RG, Rufibach K, et al. Anterior chest wall inflammation by whole-body magnetic resonance imaging in patients with spondyloarthritis: lack of association between clinical and imaging findings in a cross-sectional study. *Arthritis Res Ther* 2012;14:R3.

**Recommendation 4. Monitoring structural changes in axial SpA**

**Conventional radiography of the SI joints and/or spine may be used for long-term monitoring of structural damage, particularly new bone formation, in axial SpA. If performed, it should not be repeated more frequently than every 2nd year. MRI may provide additional information.**

1. Akgul O, Gulkesen A, Akgol G, et al. MR-defined fat infiltration of the lumbar paravertebral muscles differs between non-radiographic axial spondyloarthritis and established ankylosing spondylitis. *Mod Rheumatol* 2013;23:811-6.
2. Aaverns HL, Oxtoby J, Taylor HG, et al. Radiological outcome in ankylosing spondylitis: use of the Stoke Ankylosing Spondylitis Spine Score (SASSS). *Br J Rheumatol* 1996;35:373-6.
3. Baraliakos X, Davis J, Tsuji W, et al. Magnetic resonance imaging examinations of the spine in patients with ankylosing spondylitis before and after therapy with the tumor necrosis factor alpha receptor fusion protein etanercept. *Arthritis Rheum* 2005;52:1216-23.
4. Baraliakos X, Listing J, Rudwaleit M, et al. Radiographic progression in patients with ankylosing spondylitis after 2 years of treatment with the tumour necrosis factor alpha antibody infliximab. *Ann Rheum Dis* 2005;64:1462-6.
5. Baraliakos X, Listing J, Rudwaleit M, et al. Development of a radiographic scoring tool for ankylosing spondylitis only based on bone formation: addition of the thoracic spine improves sensitivity to change. *Arthritis Rheum* 2009;61:764-71.
6. Braun J, Baraliakos X, Golder W, et al. Analysing chronic spinal changes in ankylosing spondylitis: a systematic comparison of conventional x rays with magnetic resonance imaging using established and new scoring systems. *Ann Rheum Dis* 2004;63:1046-55.
7. Creemers MC, Franssen MJ, van't Hof MA, et al. Assessment of outcome in ankylosing spondylitis: an extended radiographic scoring system. *Ann Rheum Dis* 2005;64:127-9.
8. Lee JY, Kim JI, Park JY, et al. Cervical spine involvement in longstanding ankylosing spondylitis. *Clin Exp Rheumatol* 2005;23:331-8.
9. Lubrano E, Marchesoni A, Olivieri I, et al. The radiological assessment of axial involvement in psoriatic arthritis: a validation study of the BASRI total and the modified SASSS scoring methods. *Clin Exp Rheumatol* 2009;27:977-80.

10. Machado P, Landewé R, Braun J et al. A stratified model for health outcomes in ankylosing spondylitis. *Ann Rheum Dis* 2011;70:1758-64.
11. Machado P, Landewe R, Braun J, et al. In ankylosing spondylitis, a decrease in MRI spinal inflammation predicts improvement in spinal mobility independently of patient reported symptomatic improvement. *Arthritis Rheum* 2012;64 Suppl 10:563.
12. Madsen KB, Jurik AG. Magnetic resonance imaging grading system for active and chronic spondylarthritis changes in the sacroiliac joint. *Arthritis Care Res (Hoboken)* 2010;62:11-8.
13. Madsen KB, Jurik AG. MRI grading method for active and chronic spinal changes in spondyloarthritis. *Clin Radiol* 2010;65:6-14.
14. Puhakka KB, Jurik AG, Egund N, et al. Imaging of sacroiliitis in early seronegative spondylarthropathy. Assessment of abnormalities by MR in comparison with radiography and CT. *Acta Radiol* 2003;44:218-29.
15. Puhakka KB, Jurik AG, Schiøttz-Christensen B, et al. MRI abnormalities of sacroiliac joints in early spondylarthropathy: a 1-year follow-up study. *Scand J Rheumatol* 2004;33:332-8.
16. Puhakka KB, Jurik AG, Schiøttz-Christensen B, et al. Magnetic resonance imaging of sacroiliitis in early seronegative spondylarthropathy. Abnormalities correlated to clinical and laboratory findings. *Rheumatology (Oxford)* 2004;43:234-7.
17. Ramiro S, van Tubergen A, Stolwijk C, et al. Scoring radiographic progression in ankylosing spondylitis: should we use the modified Stoke Ankylosing Spondylitis Spine Score (mSASSS) or the Radiographic Ankylosing Spondylitis Spinal Score (RASSS)? *Arthritis Res Ther* 2013;15:R14.
18. Rudwaleit M, Baraliakos X, Listing J, et al. Magnetic resonance imaging of the spine and the sacroiliac joints in ankylosing spondylitis and undifferentiated spondyloarthritis during treatment with etanercept. *Ann Rheum Dis* 2005;64:1305-10.
19. Salaffi F, Carotti M, Garofalo G, et al. Radiological scoring methods for ankylosing spondylitis: a comparison between the Bath Ankylosing Spondylitis Radiology Index and the modified Stoke Ankylosing Spondylitis Spine Score. *Clin Exp Rheumatol* 2007;25:67-74.
20. Taylor HG, Wardle T, Beswick EJ, et al. The relationship of clinical and laboratory measurements to radiological change in ankylosing spondylitis. *Br J Rheumatol* 1991;30:330-5.
21. Taylor HG, Gadd R, Beswick EJ, et al. Quantitative radio-isotope scanning in ankylosing spondylitis: a clinical, laboratory and computerised tomographic study. *Scand J Rheumatol* 1991;20:274-9.
22. Wanders AJ, Landewé RB, Spoorenberg A, et al. What is the most appropriate radiologic scoring method for ankylosing spondylitis? A comparison of the available methods based

on the Outcome Measures in Rheumatology Clinical Trials filter. *Arthritis Rheum* 2004;50:2622-32.

23. Williamson L, Dockerty JL, Dalbeth N, et al. Clinical assessment of sacroiliitis and HLA-B27 are poor predictors of sacroiliitis diagnosed by magnetic resonance imaging in psoriatic arthritis. *Rheumatology (Oxford)* 2004;43:85-8.

#### **Recommendation 5. Monitoring disease activity in peripheral SpA**

**US and MRI may be used to monitor disease activity (particularly synovitis and enthesitis) in peripheral SpA, providing additional information on top of clinical and biochemical assessments. The decision on when to repeat US/MRI depends on the clinical circumstances. US with high-sensitivity colour or power Doppler is sufficient to detect inflammation and the use of US contrast medium is not needed.**

1. Aydin SZ, Ash ZR, Tinazzi I, et al. The link between enthesitis and arthritis in psoriatic arthritis: a switch to a vascular phenotype at insertions may play a role in arthritis development. *Ann Rheum Dis* 2013;72:992-5.
2. Aydin SZ, Karadag O, Filippucci E, et al. Monitoring Achilles enthesitis in ankylosing spondylitis during TNF-alpha antagonist therapy: an ultrasound study. *Rheumatology (Oxford)* 2010;49:578-82.
3. Balint PV, Kane D, Wilson H, et al. Ultrasonography of enthesal insertions in the lower limb in spondyloarthritis. *Ann Rheum Dis* 2002;61:905-10.
4. Bennett AN, Marzo-Ortega H, Tan AL, et al. Ten-year follow-up of SpA-related oligoarthritis involving the knee: the presence of psoriasis but not HLA-B27 or baseline MRI bone oedema predicts outcome. *Rheumatology (Oxford)* 2012;51:1099-106.
5. Borman P, Koparal S, Babaoğlu S, et al. Ultrasound detection of enthesal insertions in the foot of patients with spondyloarthritis. *Clin Rheumatol* 2006;25:373-7.
6. D'Agostino MA, Said-Nahal R, Hacquard-Bouder C, et al. Assessment of peripheral enthesitis in the spondylarthropathies by ultrasonography combined with power Doppler: a cross-sectional study. *Arthritis Rheum* 2003;48:523-33.
7. Hamdi W, Chelli-Bouaziz M, Ahmed MS, et al. Correlations among clinical, radiographic, and sonographic scores for enthesitis in ankylosing spondylitis. *Joint Bone Spine* 2011;78:270-4.
8. Kiris A, Kaya A, Ozgocmen S, Kocakoc E. Assessment of enthesitis in ankylosing spondylitis by power Doppler ultrasonography. *Skeletal Radiol* 2006;35:522-8.
9. McQueen F, Lassere M, Duer-Jensen A, et al. Testing an OMERACT MRI scoring system for peripheral psoriatic arthritis in cross-sectional and longitudinal settings. *J Rheumatol* 2009;36:1811-5.
10. Mease P, Genovese MC, Gladstein G, et al. Abatacept in the treatment of patients with psoriatic arthritis: results of a six-month, multicenter, randomized, double-blind, placebo-controlled, phase II trial. *Arthritis Rheum* 2011;63:939-48.

11. Milosavljevic J, Lindqvist U, Elvin A. Ultrasound and power Doppler evaluation of the hand and wrist in patients with psoriatic arthritis. *Acta Radiol* 2005;46:374-85.
12. Naredo E, Batlle-Gualda E, García-Vivar ML, et al. Power Doppler ultrasonography assessment of entheses in spondyloarthropathies: response to therapy of enthesal abnormalities. *J Rheumatol* 2010;37:2110-7.
13. Poggenborg RP, Boyesen P, Wiell C, et al. Reduction in MRI inflammation during adalimumab therapy in patients with psoriatic arthritis implementation of the OMERACT PsAMRIS scoring method in a follow-up study. *Arthritis Rheum* 2011;63 Suppl 10:953.
14. Spadaro A, Iagnocco A, Perrotta FM, et al. Clinical and ultrasonography assessment of peripheral enthesitis in ankylosing spondylitis. *Rheumatology (Oxford)* 2011;50:2080-6.
15. Tan YM, Østergaard M, Doyle A, et al. MRI bone oedema scores are higher in the arthritis mutilans form of psoriatic arthritis and correlate with high radiographic scores for joint damage. *Arthritis Res Ther* 2009;11:R2.

**Recommendation 6. Monitoring structural changes in peripheral SpA**  
**In peripheral SpA, if the clinical scenario requires monitoring of structural damage, then conventional radiography is recommended. MRI and/or US might provide additional information.**

1. Blackmore MG, Gladman DD, Husted J, et al. Measuring health status in psoriatic arthritis: the Health Assessment Questionnaire and its modification. *J Rheumatol* 1995;22:886-93.
2. Borman P, Koparal S, Babaoğlu S, et al. Ultrasound detection of enthesal insertions in the foot of patients with spondyloarthropathy. *Clin Rheumatol* 2006;25:373-7.
3. Hamdi W, Chelli-Bouaziz M, Ahmed MS, et al. Correlations among clinical, radiographic, and sonographic scores for enthesitis in ankylosing spondylitis. *Joint Bone Spine* 2011;78:270-4.
4. Könönen M, Kovero O, Wenneberg B, et al. Radiographic signs in the temporomandibular joint in Reiter's disease. *J Orofac Pain* 2002;16:143-7.
5. Rahman P, Gladman DD, Cook RJ, et al. Radiological assessment in psoriatic arthritis. *Br J Rheumatol* 1998;37:760-5.
6. Ravindran J, Cavill C, Balakrishnan C, et al. A modified Sharp score demonstrates disease progression in established psoriatic arthritis. *Arthritis Care Res (Hoboken)* 2010;62:86-91.
7. Taccari E, Spadaro A, Rinaldi T, et al. Comparison of the Health Assessment Questionnaire and Arthritis Impact Measurement Scale in patients with psoriatic arthritis. *Rev Rhum Engl Ed* 1998;65:751-8.

8. Tan YM, Østergaard M, Doyle A, et al. MRI bone oedema scores are higher in the arthritis mutilans form of psoriatic arthritis and correlate with high radiographic scores for joint damage. *Arthritis Res Ther* 2009;11:R2.

#### **Recommendation 7. Predicting outcome/severity in axial SpA**

**In patients with ankylosing spondylitis\* (not non-radiographic axial SpA), initial conventional radiography of the lumbar and cervical spine is recommended to detect syndesmophytes, which are predictive of development of new syndesmophytes. MRI (vertebral corner inflammatory or fatty lesions) may also be used to predict development of new radiographic syndesmophytes.**

**\*i.e. radiographic axial spondyloarthritis**

1. Aaverns HL, Oxtoby J, Taylor HG, et al. Radiological outcome in ankylosing spondylitis: use of the Stoke Ankylosing Spondylitis Spine Score (SASSS). *Br J Rheumatol* 1996;35:373-6.
2. Baraliakos X, Listing J, Rudwaleit M, et al. Radiographic progression in patients with ankylosing spondylitis after 2 years of treatment with the tumour necrosis factor alpha antibody infliximab. *Ann Rheum Dis* 2005;64:1462-6.
3. Baraliakos X, Listing J, Rudwaleit M, et al. Progression of radiographic damage in patients with ankylosing spondylitis: defining the central role of syndesmophytes. *Ann Rheum Dis* 2007;66:910-5.
4. Baraliakos X, Listing J, Rudwaleit M, et al. The relationship between inflammation and new bone formation in patients with ankylosing spondylitis. *Arthritis Res Ther* 2008;10:R104.
5. Baraliakos X, Listing J, von der Recke A, et al. The natural course of radiographic progression in ankylosing spondylitis-evidence for major individual variations in a large proportion of patients. *J Rheumatol* 2009;36:997-1002.
6. Baraliakos X, Heldmann F, Listing J, et al. The relationship of inflammation, fatty degeneration and the effect of long-term TNF-blocker treatment on the development of new bone formation in patients with ankylosing spondylitis. *Arthritis Rheum* 2012;64 Suppl 10:780.
7. Bennett AN, McGonagle D, O'Connor P, et al. Severity of baseline magnetic resonance imaging-evident sacroiliitis and HLA-B27 status in early inflammatory back pain predict radiographically evident ankylosing spondylitis at eight years. *Arthritis Rheum* 2008;58:3413-8.
8. Chiowchanwisawakit P, Lambert RG, Conner-Spady B, et al. Focal fat lesions at vertebral corners on magnetic resonance imaging predict the development of new syndesmophytes in ankylosing spondylitis. *Arthritis Rheum* 2011;63:2215-25.
9. Madsen KB, Schiøttz-Christensen B, Jurik AG. Prognostic significance of magnetic resonance imaging changes of the sacroiliac joints in spondyloarthritis-a followup study. *J Rheumatol* 2010;37:1718-27.

10. Maksymowych WP, Landewé R, Conner-Spady B, et al. Serum matrix metalloproteinase 3 is an independent predictor of structural damage progression in patients with ankylosing spondylitis. *Arthritis Rheum* 2007;56:1846-53.
11. Maksymowych WP, Chiowchanwisawakit P, Clare T, et al. Inflammatory lesions of the spine on magnetic resonance imaging predict the development of new syndesmophytes in ankylosing spondylitis: evidence of a relationship between inflammation and new bone formation. *Arthritis Rheum* 2009;60:93-102.
12. Pedersen SJ, Chiowchanwisawakit P, Lambert RG, et al. Resolution of inflammation following treatment of ankylosing spondylitis is associated with new bone formation. *J Rheumatol* 2011;38:1349-54.
13. Pedersen SJ, Sørensen IJ, Lambert RG, et al. Radiographic progression is associated with resolution of systemic inflammation in patients with axial spondylarthritis treated with tumor necrosis factor  $\alpha$  inhibitors: a study of radiographic progression, inflammation on magnetic resonance imaging, and circulating biomarkers of inflammation, angiogenesis, and cartilage and bone turnover. *Arthritis Rheum* 2011;63:3789-800.
14. Poddubnyy D, Haibel H, Listing J, et al. Baseline radiographic damage, elevated acute-phase reactant levels, and cigarette smoking status predict spinal radiographic progression in early axial spondylarthritis. *Arthritis Rheum* 2012;64:1388-98.
15. Song IH, Hermann KG, Haibel H, Althoff CE, Poddubnyy D, Listing J, Weiss A, Freundlich B, Rudwaleit M, Sieper J. Relationship between active inflammatory lesions in the spine and sacroiliac joints and new development of chronic lesions on whole-body MRI in early axial spondyloarthritis: results of the ESTHER trial at week 48. *Ann Rheum Dis* 2011;70:1257-63.
16. van der Heijde D, Machado P, Braun J, et al. MRI inflammation at the vertebral unit only marginally predicts new syndesmophyte formation: a multilevel analysis in patients with ankylosing spondylitis. *Ann Rheum Dis* 2012;71:369-73.
17. van Tubergen A, Ramiro S, van der Heijde D, et al. Development of new syndesmophytes and bridges in ankylosing spondylitis and their predictors: a longitudinal study. *Ann Rheum Dis* 2012;71:518-23.

**Recommendation 8. Predicting treatment effect in axial SpA**  
**Extensive MRI inflammatory activity (bone marrow edema), particularly in the spine in ankylosing spondylitis patients, might be used as a predictor of good clinical response to anti-TNF treatment in axial SpA. Thus, MRI might aid in the decision of initiating anti-TNF therapy, in addition to clinical examination and CRP.**

1. Barkham N, Keen HI, Coates LC, et al. Clinical and imaging efficacy of infliximab in HLA-B27-Positive patients with magnetic resonance imaging-determined early sacroiliitis. *Arthritis Rheum* 2009;60:946-54.
2. Rudwaleit M, Schwarzlose S, Hilgert ES, et al. MRI in predicting a major clinical response to anti-tumour necrosis factor treatment in ankylosing spondylitis. *Ann Rheum Dis* 2008;67:1276-81.

3. Sieper J, Baraliakos X, Listing J, et al. Persistent reduction of spinal inflammation as assessed by magnetic resonance imaging in patients with ankylosing spondylitis after 2 yrs of treatment with the anti-tumour necrosis factor agent infliximab. *Rheumatology (Oxford)* 2005;44:1525-30.

#### **Recommendation 9. Spinal fracture**

**When spinal fracture in axial SpA is suspected, conventional radiography is the recommended initial imaging method. If conventional radiography is negative, CT should be performed. MRI is an additional imaging method to CT, which can also provide information on soft tissue lesions.**

-

#### **Recommendation 10. Osteoporosis**

**In axial SpA patients without syndesmophytes in the lumbar spine on conventional radiography, osteoporosis should be assessed by hip DXA and AP-spine DXA. In patients with syndesmophytes in the lumbar spine on conventional radiography, osteoporosis should be assessed by hip DXA, supplemented by either spine DXA in lateral projection or possibly QCT of the spine.**

1. Altindag O, Karakoc M, Soran N, Tabur H, Demirkol A. Bone mineral density in patients with ankylosing spondylitis. *Romatizma* 2008;23:42-5.
2. Anandarajah AP, El-Taha M, Peng C, Reed G, Greenberg JD, Ritchlin CT. Association between focal erosions and generalised bone loss in psoriatic arthritis. *Ann Rheum Dis* 2011;70:1345-7.
3. Arends S, Spoorenberg A, Bruyn GA, Houtman PM, Leijnsma MK, Kallenberg CG, Brouwer E, van der Veer E. The relation between bone mineral density, bone turnover markers, and vitamin D status in ankylosing spondylitis patients with active disease: a cross-sectional analysis. *Osteoporos Int* 2011;22:1431-9.
4. Baek HJ, Kang SW, Lee YJ, Shin KC, Lee EB, Yoo CD, Song YW. Osteopenia in men with mild and severe ankylosing spondylitis. *Rheumatol Int* 2005;26:30-4.
5. Briot K, Durnez A, Paternotte S, Miceli-Richard C, Dougados M, Roux C. Bone oedema on MRI is highly associated with low bone mineral density in patients with early inflammatory back pain: results from the DESIR cohort. *Ann Rheum Dis* 2013;72:1914-9.
6. Capaci K, Hepguler S, Argin M, Tas I. Bone mineral density in mild and advanced ankylosing spondylitis. *Yonsei Med J* 2003;44:379-84.
7. Devogelaer JP, Maldague B, Malghem J, Nagant de Deuxchaisnes C. Appendicular and vertebral bone mass in ankylosing spondylitis. A comparison of plain radiographs with single- and dual-photon absorptiometry and with quantitative computed tomography. *Arthritis Rheum* 2002;35:1062-7.
8. Dheda K, Cassim B, Patel N, Mody GM. A comparison of bone mineral density in Indians with psoriatic polyarthritis and healthy Indian volunteers. *Clin Rheumatol* 2004;23:89.



9. Donnelly S, Doyle DV, Denton A, Rolfe I, McCloskey EV, Spector TD. Bone mineral density and vertebral compression fracture rates in ankylosing spondylitis. *Ann Rheum Dis* 1994;53:117-21.
10. Dos Santos FP, Constantin A, Laroche M, Destombes F, Bernard J, Mazières B, Cantagrel A. Whole body and regional bone mineral density in ankylosing spondylitis. *J Rheumatol* 2001;28:547-9.
11. El Maghraoui A, Borderie D, Cherruau B, Edouard R, Dougados M, Roux C. Osteoporosis, body composition, and bone turnover in ankylosing spondylitis. *J Rheumatol* 1999;26:2205-9.
12. Frediani B, Allegri A, Falsetti P, Storri L, Bisogno S, Baldi F, Filipponi P, Marcolongo R. Bone mineral density in patients with psoriatic arthritis. *J Rheumatol* 2001;28:138-43.
13. Franck H, Meurer T, Hofbauer LC. Evaluation of bone mineral density, hormones, biochemical markers of bone metabolism, and osteoprotegerin serum levels in patients with ankylosing spondylitis. *J Rheumatol* 2004;31:2236-41.
14. Gilgil E, Kaçar C, Tuncer T, Bütün B. The association of syndesmophytes with vertebral bone mineral density in patients with ankylosing spondylitis. *J Rheumatol* 2005;32:292-4.
15. Gratacós J, Collado A, Pons F, Osaba M, Sanmartí R, Roqué M, Larrosa M, Muñoz-Gómez J. Significant loss of bone mass in patients with early, active ankylosing spondylitis: a followup study. *Arthritis Rheum* 1999;42:2319-24.
16. Grazio S, Cvijetić S, Vlak T, Grubišić F, Matijević V, Nemčić T, Punda M, Kusić Z. Osteoporosis in psoriatic arthritis: is there any? *Wien Klin Wochenschr* 2011;123:743-50.
17. Grazio S, Kusić Z, Cvijetić S, Grubišić F, Balenović A, Nemčić T, Matijević-Mikelić V, Punda M, Sieper J. Relationship of bone mineral density with disease activity and functional ability in patients with ankylosing spondylitis: a cross-sectional study. *Rheumatol Int* 2012;32:2801-8.
18. Grisar J, Bernecker PM, Aringer M, Redlich K, Sedlak M, Wolozczuk W, Spitzauer S, Grampp S, Kainberger F, Ebner W, Smolen JS, Pietschmann P. Ankylosing spondylitis, psoriatic arthritis, and reactive arthritis show increased bone resorption, but differ with regard to bone formation. *J Rheumatol* 2002;29:1430-6.
19. Haugeberg G, Bennett AN, McGonagle D, Emery P, Marzo-Ortega H. Bone loss in very early inflammatory back pain in undifferentiated spondyloarthropathy: a 1-year observational study. *Ann Rheum Dis* 2010;69:1364-6.
20. Jansen TL, Aarts MH, Zanen S, Bruyn GA. Risk assessment for osteoporosis by quantitative ultrasound of the heel in ankylosing spondylitis. *Clin Exp Rheumatol* 2003;21:599-604.
21. Jun JB, Joo KB, Her MY, Kim TH, Bae SC, Yoo DH, Kim SK. Femoral bone mineral density is associated with vertebral fractures in patients with ankylosing spondylitis: a cross-sectional study. *J Rheumatol* 2006;33:1637-41.

22. Karberg K, Zochling J, Sieper J, Felsenberg D, Braun J. Bone loss is detected more frequently in patients with ankylosing spondylitis with syndesmophytes. *J Rheumatol* 2005;32:1290-8.
23. Kaya A, Ozgocmen S, Kamanli A, Ardicoglu O. Bone loss in ankylosing spondylitis: does syndesmophyte formation have an influence on bone density changes? *Med Princ Pract* 2009;18:470-6.
24. Klingberg E, Lorentzon M, Mellström D, Geijer M, Göthlin J, Hilme E, Hedberg M, Carlsten H, Forsblad-d'Elia H. Osteoporosis in ankylosing spondylitis - prevalence, risk factors and methods of assessment. *Arthritis Res Ther* 2012;14:R108.
25. Korczowska I, Przepiera-Bedzak H, Brzosko M, Lacki JK, Trefler J, Hrycaj P. Bone tissue metabolism in men with ankylosing spondylitis. *Adv Med Sci* 2011;56:264-9.
26. Maillefert JF, Aho LS, El Maghraoui A, Dougados M, Roux C. Changes in bone density in patients with ankylosing spondylitis: a two-year follow-up study. *Osteoporos Int* 2001;12:605-9.
27. Meirelles ES, Borelli A, Camargo OP. Influence of disease activity and chronicity on ankylosing spondylitis bone mass loss. *Clin Rheumatol* 1999;18:364-8.
28. Mermerci Başkan B, Pekin Doğan Y, Sivas F, Bodur H, Ozoran K. The relation between osteoporosis and vitamin D levels and disease activity in ankylosing spondylitis. *Rheumatol Int* 2010;30:375-81.
29. Mitra D, Elvins DM, Collins AJ. Biochemical markers of bone metabolism in mild ankylosing spondylitis and their relationship with bone mineral density and vertebral fractures. *J Rheumatol* 1999;26:2201-4.
30. Mullaji AB, Upadhyay SS, Ho EK. Bone mineral density in ankylosing spondylitis. DEXA comparison of control subjects with mild and advanced cases. *J Bone Joint Surg Br* 1994;76:660-5.
31. Muntean L, Rojas-Vargas M, Font P, Simon SP, Rednic S, Schiotis R, Stefan S, Tamas MM, Bolosiu HD, Collantes-Estévez E. Relative value of the lumbar spine and hip bone mineral density and bone turnover markers in men with ankylosing spondylitis. *Clin Rheumatol* 2011;30:691-5.
32. Park MC, Chung SJ, Park YB, Lee SK. Bone and cartilage turnover markers, bone mineral density, and radiographic damage in men with ankylosing spondylitis. *Yonsei Med J* 2008.49:288-94.
33. Pedreira PG, Pinheiro MM, Szejnfeld VL. Bone mineral density and body composition in postmenopausal women with psoriasis and psoriatic arthritis. *Arthritis Res Ther* 2011;13:R16.
34. Sarikaya S, Basaran A, Tekin Y, Ozdolap S, Ortancil O. Is osteoporosis generalized or localized to central skeleton in ankylosing spondylitis? *J Clin Rheumatol* 2007;13:20-4.

35. Speden DJ, Calin AI, Ring FJ, Bhalla AK. Bone mineral density, calcaneal ultrasound, and bone turnover markers in women with ankylosing spondylitis. *J Rheumatol* 2002;29:516-21.
36. Taylan A, Sari I, Akinci B, Bilge S, Kozaci D, Akar S, Colak A, Yalcin H, Gunay N, Akkoc N. Biomarkers and cytokines of bone turnover: extensive evaluation in a cohort of patients with ankylosing spondylitis. *BMC Musculoskelet Disord* 2012;13:191.
37. Toussirot E, Michel F, Wendling D. Bone density, ultrasound measurements and body composition in early ankylosing spondylitis. *Rheumatology (Oxford)* 2001;40:882-8.
38. Ulu MA, Çevik R, Dilek B. Comparison of PA spine, lateral spine, and femoral BMD measurements to determine bone loss in ankylosing spondylitis. *Rheumatol Int* 2012;29:29.
39. van der Weijden MA, van Denderen JC, Lems WF, Heymans MW, Dijkmans BA, van der Horst-Bruinsma IE. Low bone mineral density is related to male gender and decreased functional capacity in early spondylarthropathies. *Clin Rheumatol* 2011;30:497-503.
40. Vasdev V, Bhakuni D, Garg MK, Narayanan K, Jain R, Chadha D. "Bone mineral density in young males with ankylosing spondylitis. *Int J Rheum Dis* 2011;14:68-73.
41. Will R, Palmer R, Bhalla AK, Ring F, Calin A. Osteoporosis in early ankylosing spondylitis: a primary pathological event? *Lancet* 1989;2:1483-5.
42. Will R, Palmer R, Bhalla AK, Ring F, Calin A. Bone loss as well as bone formation is a feature of progressive ankylosing spondylitis. *Br J Rheumatol* 1990;29:498-9.

**S6. Quality assessment of included studies for individual recommendations (R) with QUADAS-2**

**S6.1**

**R1**

**Risk of bias**

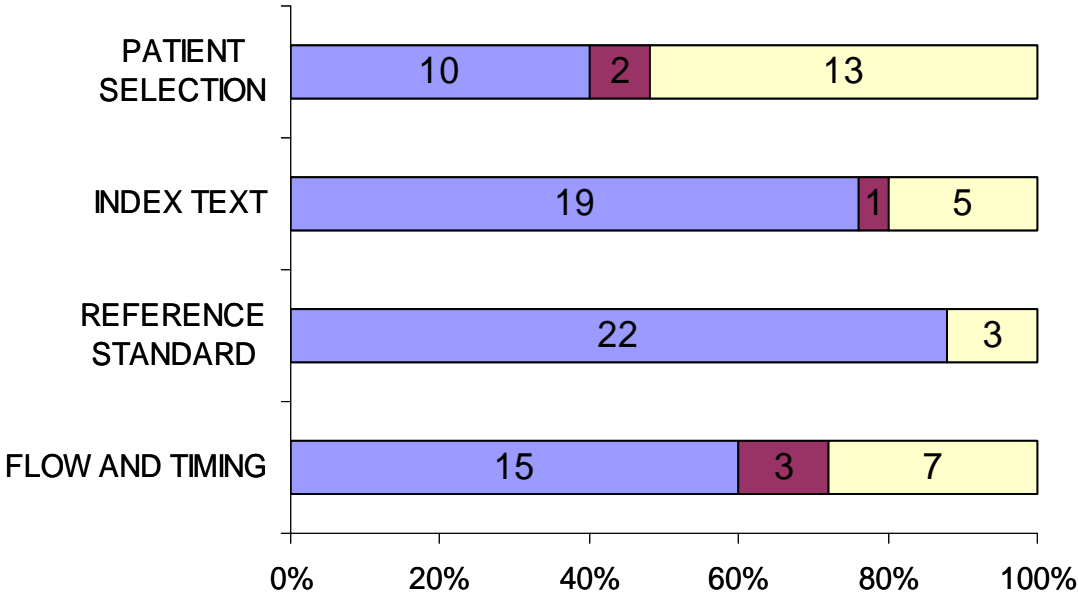

**Applicability concerns**

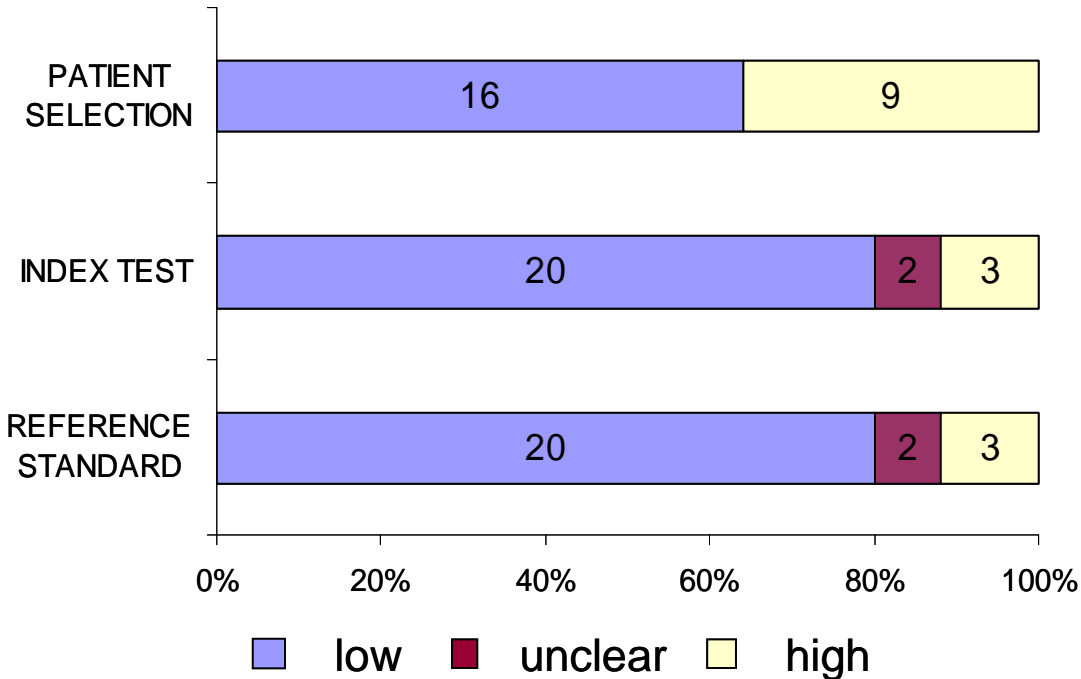

R2

Risk of bias

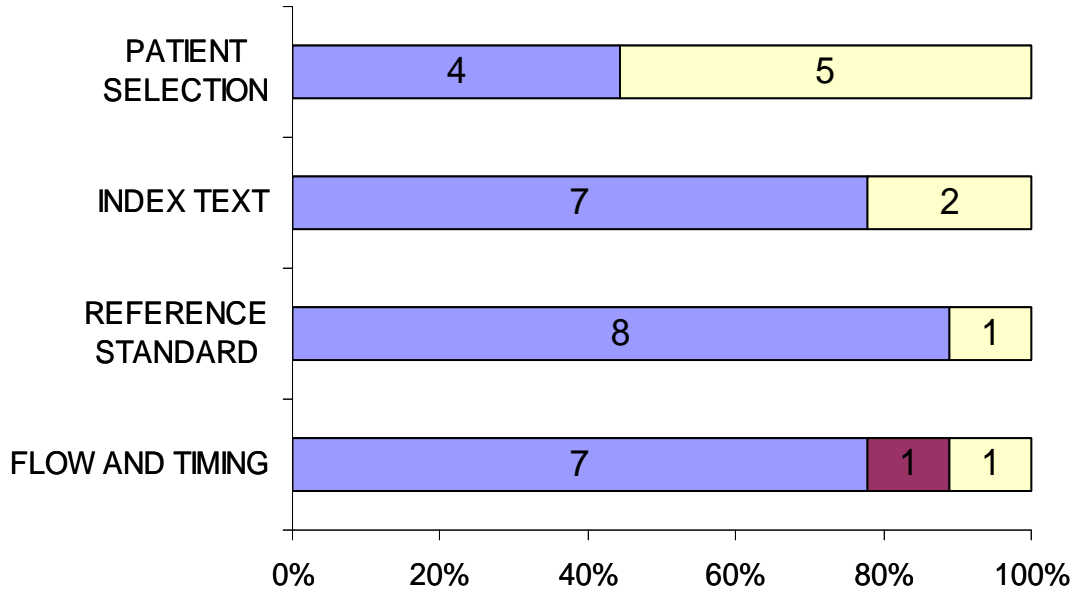

Applicability concerns

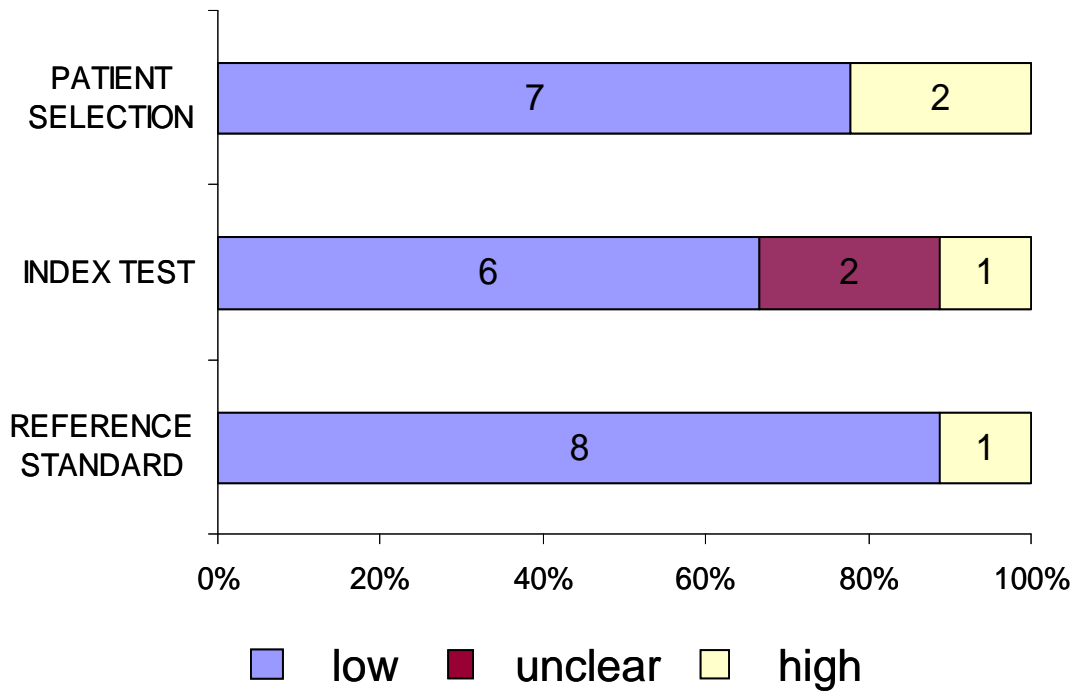

R3

Risk of bias

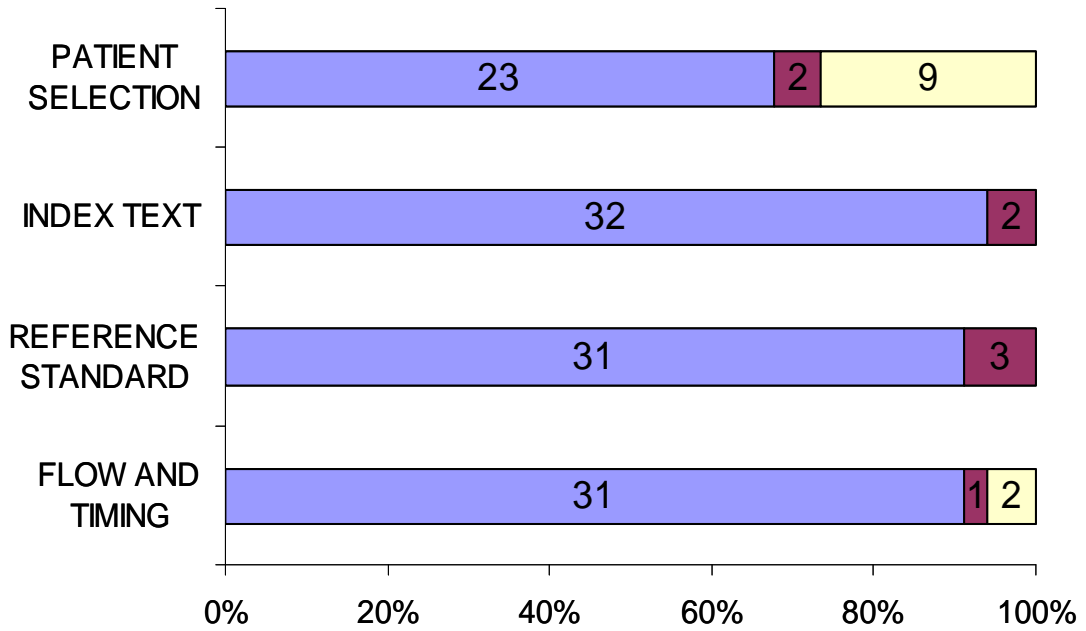

Applicability concerns

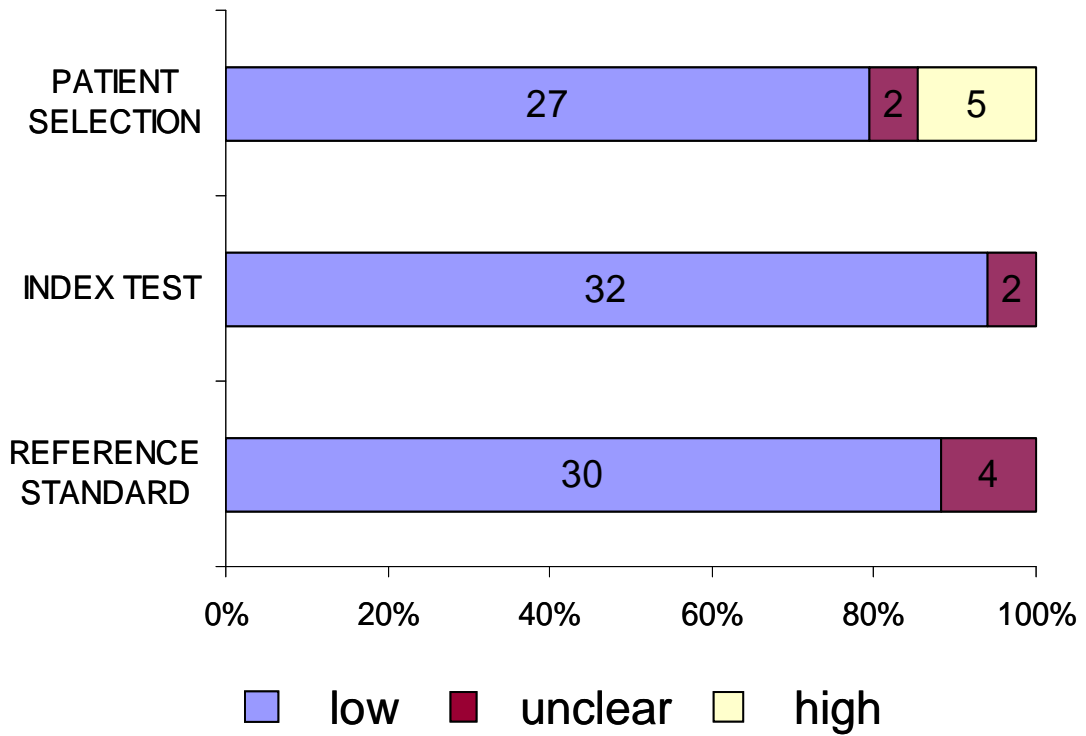

R4

Risk of bias

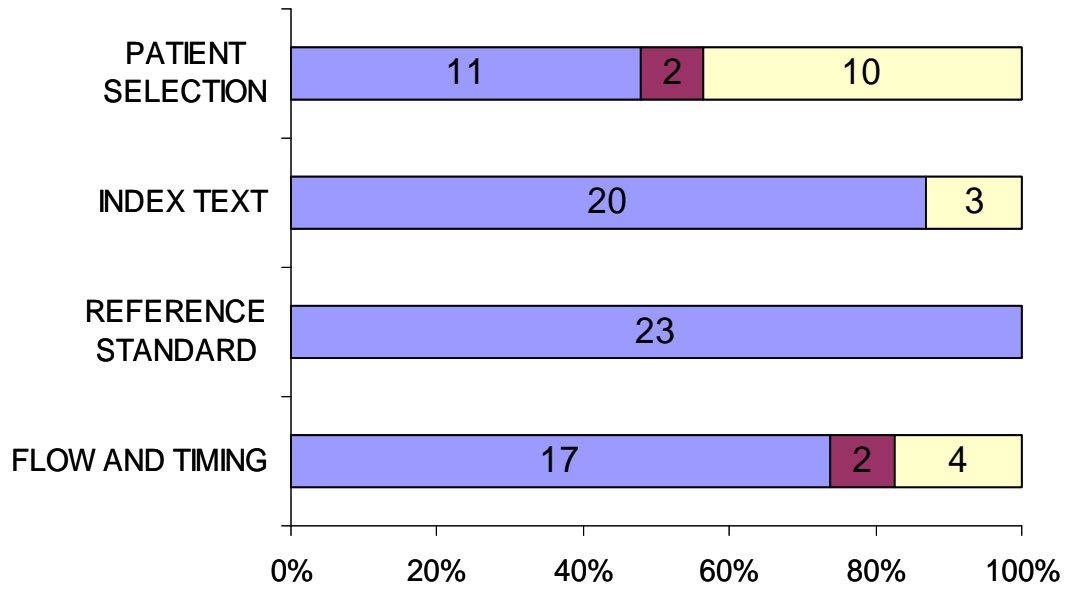

Applicability concerns

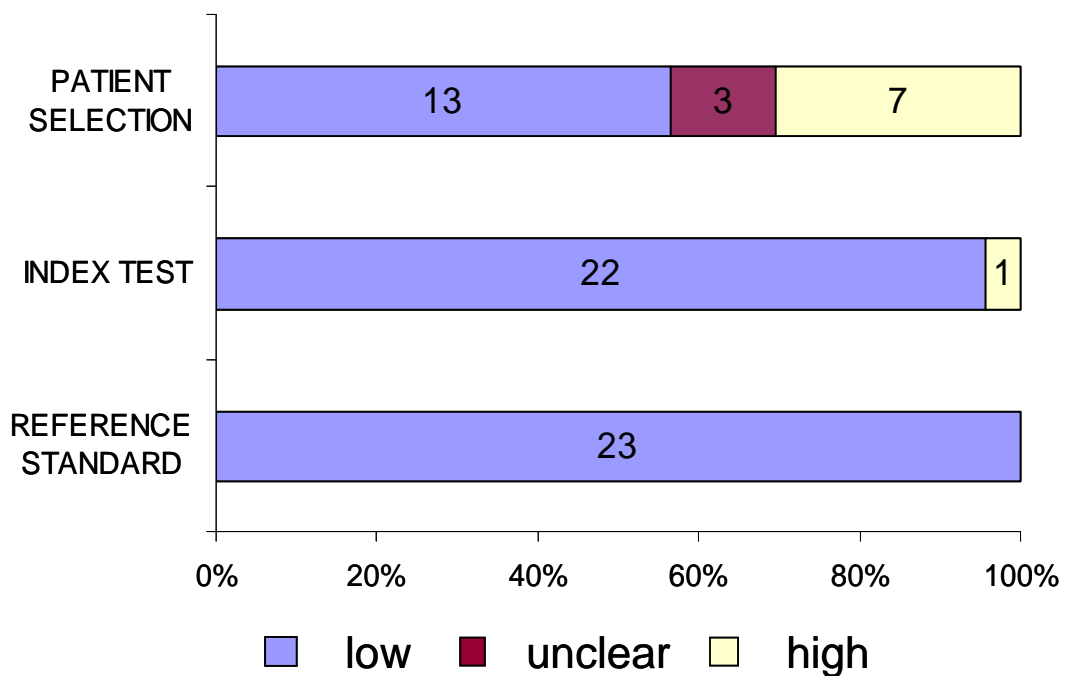

R5

Risk of bias

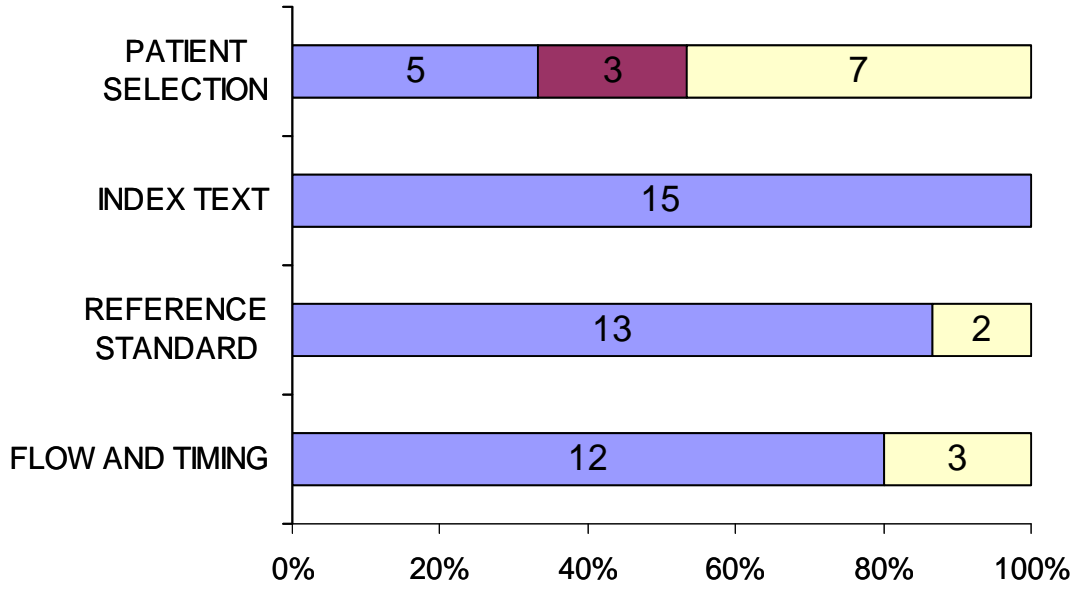

Applicability concerns

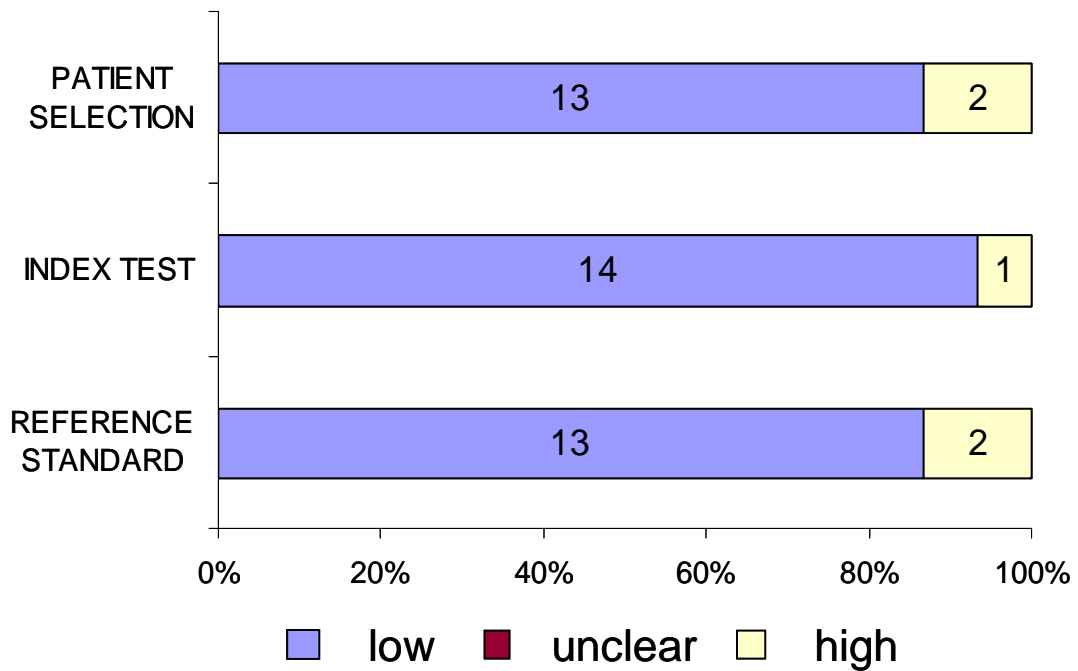



R6

Risk of bias

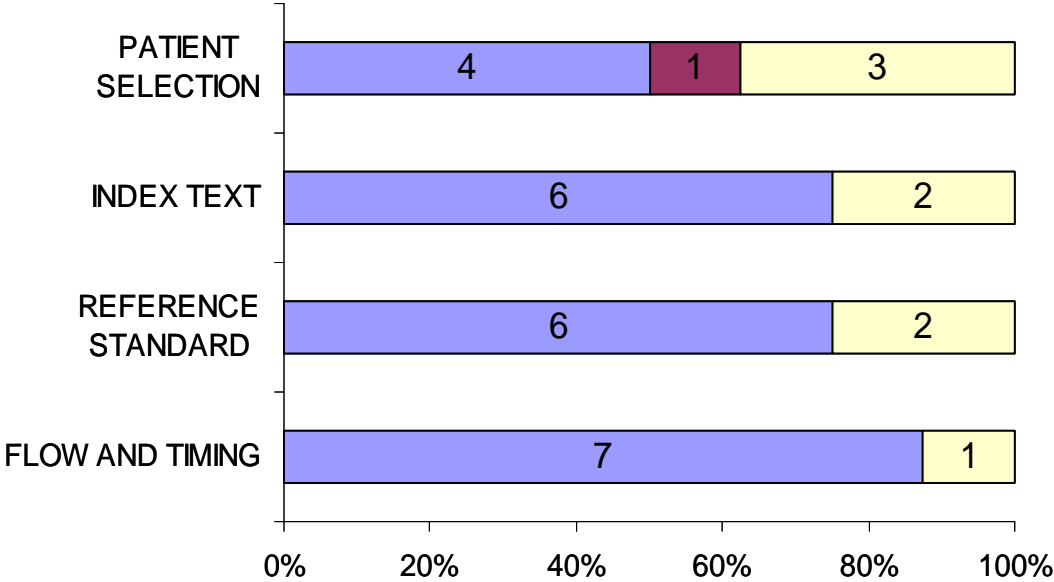

Applicability concerns

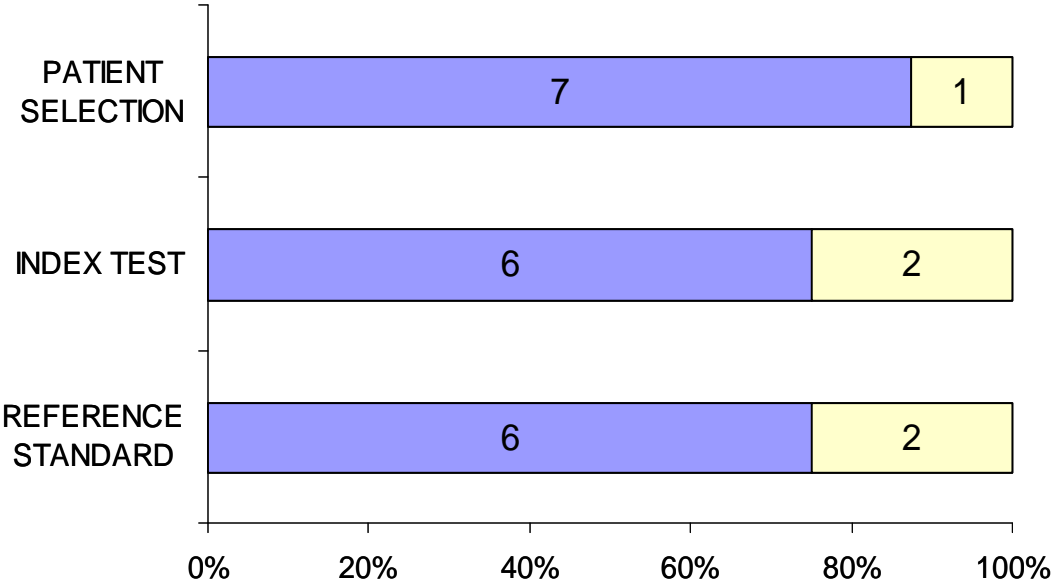

low unclear high

R7

Risk of bias

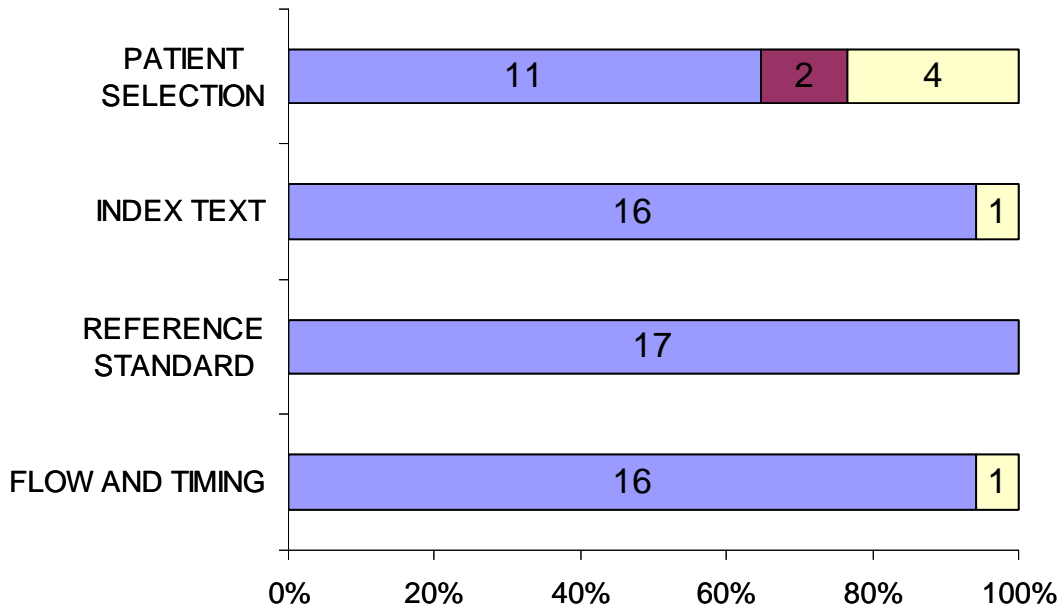

Applicability concerns

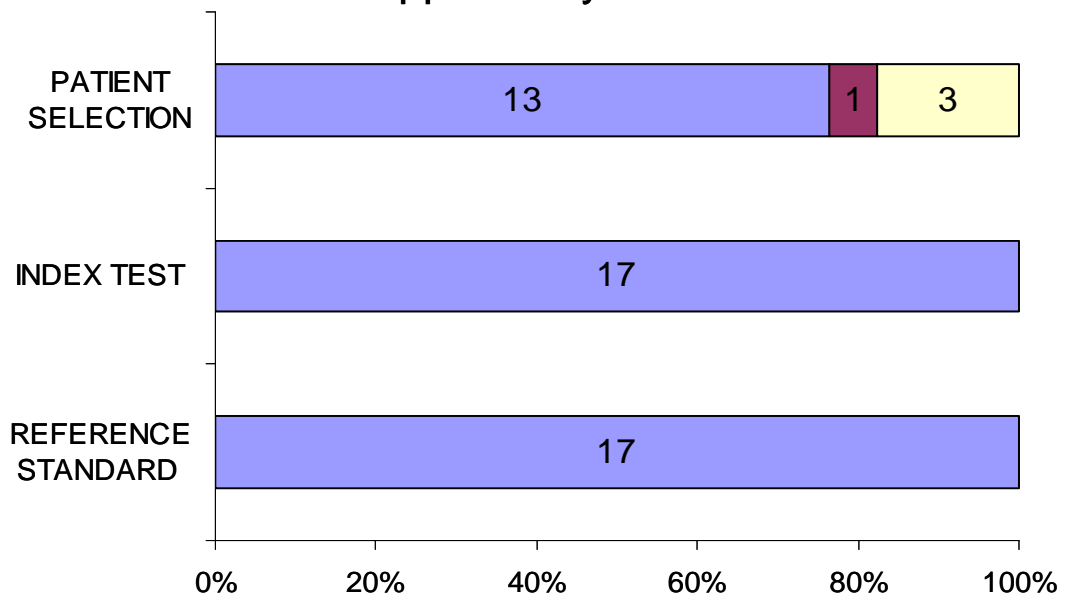

low    unclear    high

### R8

#### Risk of bias

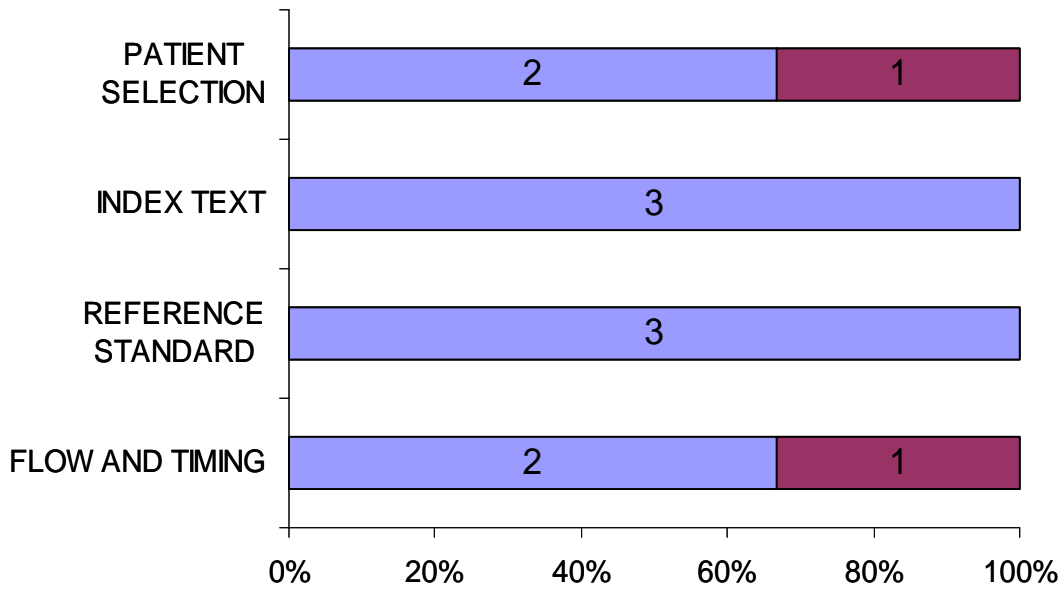

#### Applicability concerns

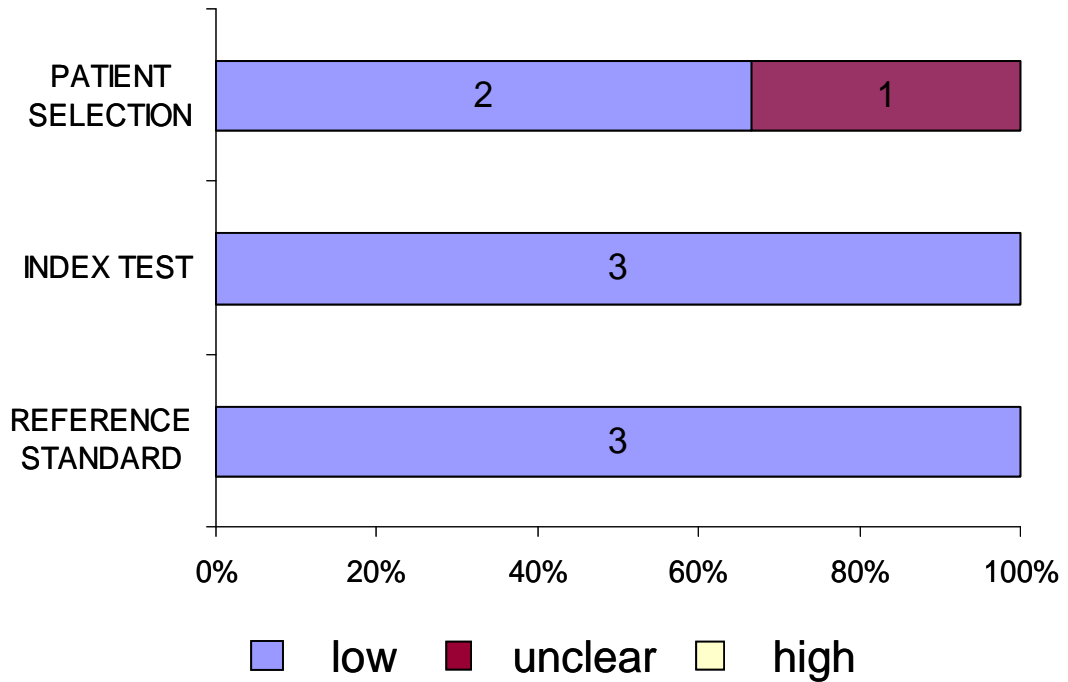

R10

Risk of bias

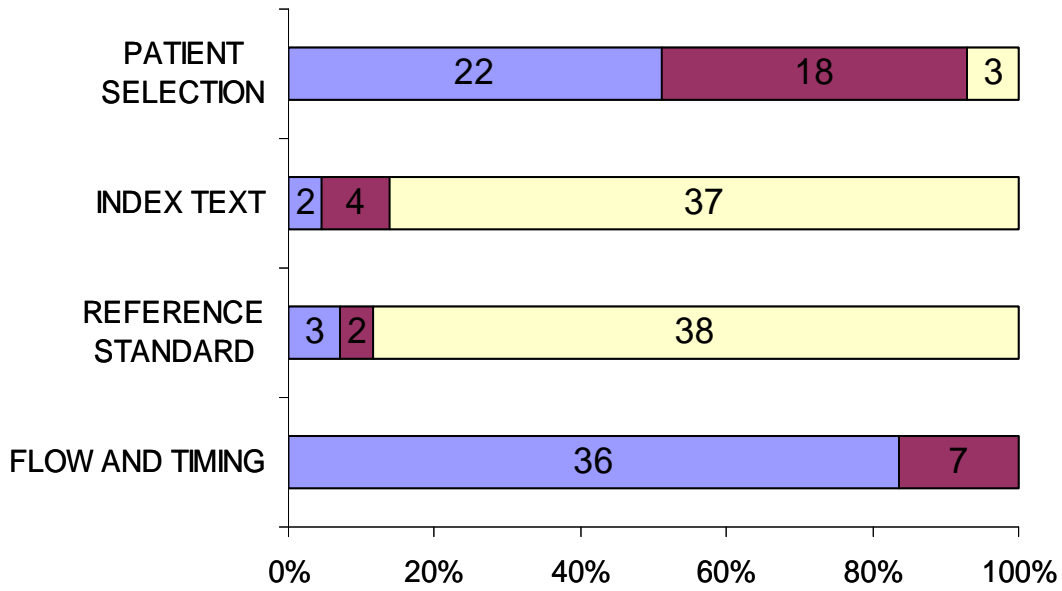

Applicability concerns

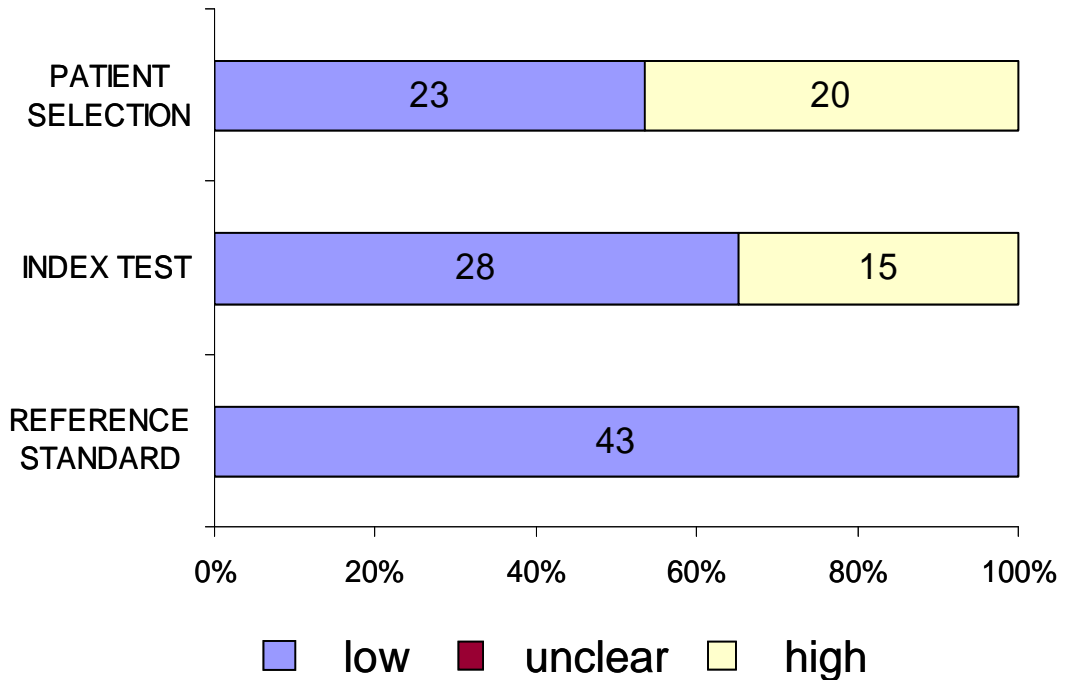

Supplement: annrheumdis-2014-206971supp.pdf [file annrheumdis-2014-206971supp.pdf]
